# Supplementary material for: Comparative safety of direct oral anticoagulants and low-molecular-weight heparin in patients with venous thromboembolism and cancer in Europe
Source: Atypon-hosted journal article supplement (doi:10.57264/cer-2025-0072), 2026-05-01
Supplement: supplementary material.docx [file supplementary%20material.docx]

# Supplementary Material

**S1. ICD-10 codes used for the identification of VTE**

| **ICD-10 Code** | **Description** |
| --- | --- |
| I67.6 | Nonpyogenic thrombosis of intracranial venous system |
| I80.1 | Phlebitis and thrombophlebitis of femoral vein |
| I80.2 | Phlebitis and thrombophlebitis of other deep vessels of lower extremities |
| I80.3 | Phlebitis and thrombophlebitis of lower extremities, unspecified |
| I80.9 | Phlebitis and thrombophlebitis of unspecified site |
| I81 | Portal vein thrombosis |
| I82.1 | Thrombophlebitis migrans |
| I82.2 | Embolism and thrombosis of vena cava |
| I82.3 | Embolism and thrombosis of renal vein |
| I82.8 | Embolism and thrombosis of other specified veins |
| I82.9 | Embolism and thrombosis of unspecified vein |
| I26.0 | PE with mention of acute cor pulmonale |
| I26.9 | PE without mention of acute cor pulmonale |

Abbreviations: ICD-10: International Classification of Diseases, 10th Revision; PE; pulmonary embolism

**S2. Cancer risk types**

| **Very High-risk Cancers** | **High Risk Cancers** | **Other Cancers** |
| --- | --- | --- |
| Stomach | Lung | All other cancers |
| Pancreas | Lymphoma |  |
| Brain | Gynecological |  |
|  | Bladder |  |
|  | Testicular |  |
|  | Renal cell carcinoma |  |

**S3. Power calculations for overall bleeding and for rVTE**

| **HR** | **Apixaban compared to LMWH** |
| --- | --- |
| **Power (%)** |
| **Power calculations for rVTE** |  |
| 0.9 | 10.93% |
| 0.85 | 18.33% |
| 0.8 | 28.91% |
| 0.75 | 42.05% |
| 0.7 | 56.38% |
| 0.65 | 70.09% |
| 0.6077 | 80% |
| 0.6 | 81.58% |
| 0.55 | 89.95% |
| 0.5 | 95.22% |
| 0.4 | 99.34% |
| **Power Calculations for Overall Bleeding** |  |
| 0.9 | 22.05% |
| 0.85 | 42.98% |
| 0.8 | 66.48% |
| 0.7658 | 80% |
| 0.75 | 84.94% |
| 0.7 | 95.04% |
| 0.65 | 98.84% |
| 0.6 | 99.82% |
| 0.55 | 99.98% |
| 0.5 | 99.99% |
| 0.4 | 100.00% |

Abbreviations: HR: hazard ratio; LMWH: low-molecular weight heparin; rVTE: recurrent venous thromboembolism. Note: The table shows the power for the comparison across a range of HR values. There was 80% power to detect a hazard ratio of 0.61 for rVTE and 0.77 for overall bleeding.

**S4.1. Baseline characteristics before and after IPTW: DOAC vs. LMWH, patients with active cancer (UK)**

|  | **Before IPTW** | | | | | | **Post IPTW** | | | | | |
| --- | --- | --- | --- | --- | --- | --- | --- | --- | --- | --- | --- | --- |
| **LMWH + Apixaban** | | | **LMWH + Rivaroxaban** | | | **LMWH + Apixaban** | | | **LMWH + Rivaroxaban** | | |
| **Measure** | **LMWH N = 8,388** | **Apixaban N = 635** | **Standardized Difference for Unweighted Study Cohort** | **LMWH N = 8,388** | **Rivaroxaban N = 1,056** | **Standardized Difference for Unweighted Study Cohort** | **LMWH N = 8,388** | **Apixaban N = 635** | **Standardized Difference for Weighted Study Cohort** | **LMWH N = 8,388** | **Rivaroxaban N = 1,056** | **Standardized Difference for Weighted Study Cohort** |
| **Age** |  |  | **0.439** |  |  | **0.345** |  |  | **0.056** |  |  | **0.025** |
| Mean (SD) | 66.8 (11.9) | 72.1 (12.3) |  | 66.8 (11.9) | 71.0 (12.7) |  | 67.0 (11.9) | 67.7 (12.7) |  | 67.1 (11.9) | 67.4 (12.9) |  |
| **Index VTE diagnosis, n (%)** |  |  | **0.048** |  |  | **0.165** |  |  | **0.030** |  |  | **0.037** |
| DVT | 3,181 (37.9%) | 226 (35.6%) |  | 3,181 (37.9%) | 486 (46.0%) |  | 3,171 (37.8%) | 231 (36.3%) |  | 3,235 (38.6%) | 426 (40.4%) |  |
| PE (with or without DVT) | 5,207 (62.1%) | 409 (64.4%) |  | 5,207 (62.1%) | 570 (54.0%) |  | 5,217 (62.2%) | 404 (63.7%) |  | 5,153 (61.4%) | 630 (59.6%) |  |
| **Baseline CCI** |  |  | **0.285** |  |  | **0.304** |  |  | **0.020** |  |  | **0.046** |
| Mean (SD) | 5.6 (2.2) | 5.0 (2.4) |  | 5.6 (2.2) | 4.9 (2.3) |  | 5.6 (2.3) | 5.6 (2.3) |  | 5.6 (2.3) | 5.7 (2.2) |  |
| Prior bleeds | 1,085 (12.9%) | 94 (14.8%) | 0.054 | 1,085 (12.9%) | 150 (14.2%) | 0.037 | 1,093 (13.0%) | 91 (14.3%) | 0.038 | 1,093 (13.0%) | 152 (14.4%) | 0.039 |
| **Selected CCI comorbidities during baseline** |  |  |  |  |  |  |  |  |  |  |  |  |
| Myocardial infarction | 346 (4.1%) | 30 (4.7%) | 0.029 | 346 (4.1%) | 56 (5.3%) | 0.056 | 348 (4.2%) | 25 (3.9%) | 0.014 | 354 (4.2%) | 46 (4.3%) | 0.005 |
| Congestive heart failure | 639 (7.6%) | 87 (13.7%) | 0.198 | 639 (7.6%) | 104 (9.8%) | 0.079 | 663 (7.9%) | 58 (9.2%) | 0.045 | 652 (7.8%) | 82 (7.7%) | 0.001 |
| Peripheral vascular disease | 541 (6.4%) | 51 (8.0%) | 0.061 | 541 (6.4%) | 71 (6.7%) | 0.011 | 546 (6.5%) | 31 (4.9%) | 0.070 | 543 (6.5%) | 79 (7.5%) | 0.039 |
| Cerebrovascular disease | 663 (7.9%) | 88 (13.9%) | 0.192 | 663 (7.9%) | 130 (12.3%) | 0.147 | 684 (8.2%) | 62 (9.7%) | 0.054 | 689 (8.2%) | 97 (9.2%) | 0.034 |
| Dementia | 121 (1.4%) | 38 (6.0%) | 0.242 | 121 (1.4%) | 54 (5.1%) | 0.207 | 133 (1.6%) | 13 (2.0%) | 0.034 | 137 (1.6%) | 24 (2.3%) | 0.045 |
| COPD and/or asthma | 2,380 (28.4%) | 235 (37.0%) | 0.185 | 2,380 (28.4%) | 341 (32.3%) | 0.085 | 2,415 (28.8%) | 190 (29.9%) | 0.025 | 2,411 (28.7%) | 332 (31.5%) | 0.060 |
| Peptic ulcer disease | 524 (6.2%) | 50 (7.9%) | 0.064 | 524 (6.2%) | 64 (6.1%) | 0.008 | 532 (6.3%) | 45 (7.0%) | 0.028 | 521 (6.2%) | 63 (6.0%) | 0.010 |
| Rheumatic disease | 1,082 (12.9%) | 110 (17.3%) | 0.124 | 1,082 (12.9%) | 157 (14.9%) | 0.057 | 1,100 (13.1%) | 93 (14.7%) | 0.045 | 1,095 (13.1%) | 135 (12.7%) | 0.009 |
| Diabetes without chronic complication | 833 (9.9%) | 76 (12.0%) | 0.065 | 833 (9.9%) | 98 (9.3%) | 0.022 | 843 (10.0%) | 71 (11.2%) | 0.037 | 828 (9.9%) | 110 (10.4%) | 0.017 |
| Diabetes with chronic complication | 550 (6.6%) | 68 (10.7%) | 0.148 | 550 (6.6%) | 92 (8.7%) | 0.081 | 565 (6.7%) | 51 (8.0%) | 0.050 | 565 (6.7%) | 78 (7.4%) | 0.025 |
| Mild liver disease | 323 (3.9%) | 37 (5.8%) | 0.092 | 323 (3.9%) | 44 (4.2%) | 0.016 | 331 (3.9%) | 25 (4.0%) | 0.001 | 325 (3.9%) | 35 (3.3%) | 0.031 |
| Moderate or severe liver disease | 60 (0.7%) | 6 (0.9%) | 0.025 | 60 (0.7%) | <5 | 0.046 | 60 (0.7%) | 6 (0.9%) | 0.023 | 59 (0.7%) | 5 (0.5%) | 0.028 |
| Renal disease | 1,891 (22.5%) | 218 (34.3%) | 0.264 | 1,891 (22.5%) | 315 (29.8%) | 0.166 | 1,937 (23.1%) | 170 (26.8%) | 0.087 | 1,940 (23.1%) | 276 (26.1%) | 0.070 |
| Hemiplegia or paraplegia | 143 (1.7%) | 11 (1.7%) | 0.002 | 143 (1.7%) | 36 (3.4%) | 0.108 | 143 (1.7%) | 6 (1.0%) | 0.065 | 153 (1.8%) | 32 (3.0%) | 0.077 |
| AIDS/HIV | 24 (0.3%) | <5 | 0.027 | 24 (0.3%) | 5 (0.5%) | 0.030 | 24 (0.3%) | 0 (0.03%) | 0.062 | 23 (0.3%) | 6 (0.6%) | 0.048 |
| **VTE related comorbidities during baseline, n (%)** |  |  |  |  |  |  |  |  |  |  |  |  |
| Hypertension | 5,288 (63.0%) | 463 (72.9%) | 0.213 | 5,288 (63.0%) | 723 (68.5%) | 0.114 | 5,329 (63.5%) | 415 (65.4%) | 0.039 | 5,324 (63.5%) | 682 (64.6%) | 0.023 |
| Sepsis three months before index date | 683 (8.1%) | 49 (7.7%) | 0.016 | 683 (8.1%) | 61 (5.8%) | 0.093 | 680 (8.1%) | 41 (6.5%) | 0.061 | 666 (7.9%) | 78 (7.4%) | 0.021 |
| Pneumonia three months before index date | 976 (11.6%) | 115 (18.1%) | 0.183 | 976 (11.6%) | 148 (14.0%) | 0.071 | 1,000 (11.9%) | 79 (12.4%) | 0.016 | 993 (11.8%) | 121 (11.5%) | 0.012 |
| Stroke three months before index date | 219 (2.6%) | 33 (5.2%) | 0.134 | 219 (2.6%) | 53 (5.0%) | 0.126 | 229 (2.7%) | 26 (4.0%) | 0.072 | 233 (2.8%) | 37 (3.5%) | 0.041 |
| Cardiac arrest three months before index date | 14 (0.2%) | 6 (0.9%) | 0.105 | 14 (0.2%) | <5 | 0.041 | 14 (0.2%) | <5 | 0.075 | 14 (0.2%) | <5 | 0.035 |
| Obesity | 1,941 (23.1%) | 181 (28.5%) | 0.123 | 1,941 (23.1%) | 274 (25.9%) | 0.065 | 1,967 (23.4%) | 148 (23.3%) | 0.005 | 1,966 (23.4%) | 263 (24.9%) | 0.034 |
| Inflammatory Bowel Disease | 188 (2.2%) | 18 (2.8%) | 0.038 | 188 (2.2%) | 25 (2.4%) | 0.008 | 191 (2.3%) | 12 (1.9%) | 0.025 | 189 (2.3%) | 25 (2.4%) | 0.011 |
| Varicose veins | 1,078 (12.9%) | 123 (19.4%) | 0.178 | 1,078 (12.9%) | 164 (15.5%) | 0.077 | 1,103 (13.1%) | 83 (13.1%) | 0.001 | 1,096 (13.1%) | 142 (13.4%) | 0.011 |
| Ischemic heart disease/coronary artery disease | 1,084 (12.9%) | 115 (18.1%) | 0.144 | 1,084 (12.9%) | 176 (16.7%) | 0.106 | 1,104 (13.2%) | 83 (13.1%) | 0.001 | 1,110 (13.2%) | 147 (14.0%) | 0.021 |
| Anemia | 2,277 (27.1%) | 219 (34.5%) | 0.160 | 2,277 (27.1%) | 276 (26.1%) | 0.023 | 2,301 (27.4%) | 180 (28.4%) | 0.021 | 2,267 (27.0%) | 293 (27.7%) | 0.016 |
| Coagulation defects | 317 (3.8%) | 32 (5.0%) | 0.061 | 317 (3.8%) | 33 (3.1%) | 0.036 | 320 (3.8%) | 18 (2.8%) | 0.058 | 313 (3.7%) | 48 (4.5%) | 0.041 |
| Dyspepsia | 2,156 (25.7%) | 151 (23.8%) | 0.045 | 2,156 (25.7%) | 242 (22.9%) | 0.065 | 2,148 (25.6%) | 152 (23.9%) | 0.038 | 2,131 (25.4%) | 238 (22.5%) | 0.068 |
| Hyperlipidemia | 645 (7.7%) | 67 (10.6%) | 0.100 | 645 (7.7%) | 82 (7.8%) | 0.003 | 657 (7.8%) | 43 (6.8%) | 0.040 | 644 (7.7%) | 74 (7.1%) | 0.024 |
| Sleep apnea | 158 (1.9%) | 10 (1.6%) | 0.024 | 158 (1.9%) | 32 (3.0%) | 0.074 | 157 (1.9%) | 9 (1.4%) | 0.035 | 167 (2.0%) | 30 (2.9%) | 0.056 |
| Spinal cord injury | <5 | <5 | 0.034 | <5 | 0 (0%) | 0.031 | <5 | <5 | 0.013 | <5 | 0 (0%) | 0.030 |
| Thrombophilia | 71 (0.8%) | 22 (3.5%) | 0.181 | 71 (0.8%) | 31 (2.9%) | 0.154 | 77 (0.9%) | 7 (1.1%) | 0.015 | 80 (1.0%) | 11 (1.0%) | 0.008 |
| Falls | 1,427 (17.0%) | 176 (27.7%) | 0.259 | 1,427 (17.0%) | 251 (23.8%) | 0.168 | 1,464 (17.5%) | 117 (18.5%) | 0.026 | 1,466 (17.5%) | 190 (18.0%) | 0.013 |
| **Medication within 90 days prior to index date, n (%)** |  |  |  |  |  |  |  |  |  |  |  |  |
| Platelet aggregation inhibitors | 296 (3.5%) | 33 (5.2%) | 0.082 | 296 (3.5%) | 58 (5.5%) | 0.095 | 302 (3.6%) | 21 (3.3%) | 0.015 | 306 (3.7%) | 47 (4.5%) | 0.041 |
| NSAIDs | 1,252 (14.9%) | 86 (13.5%) | 0.040 | 1,252 (14.9%) | 161 (15.2%) | 0.009 | 1,246 (14.9%) | 93 (14.7%) | 0.004 | 1,254 (14.9%) | 150 (14.2%) | 0.021 |
| Estrogen-based contraceptives and estrogen treatment for menopausal symptoms | 112 (1.3%) | <5 | 0.113 | 112 (1.3%) | 14 (1.3%) | 0.001 | 107 (1.3%) | 6 (1.0%) | 0.030 | 111 (1.3%) | 14 (1.3%) | 0.001 |
| **Diagnostic setting, n (%)** |  |  | **0.185** |  |  | **0.139** |  |  | **0.022** |  |  | **0.091** |
| Inpatient | 5,271 (62.8%) | 452 (71.2%) |  | 5,271 (62.8%) | 593 (56.2%) |  | 5,304 (63.2%) | 398 (62.7%) |  | 5,221 (62.2%) | 629 (59.5%) |  |
| Outpatient | 130 (1.5%) | 11 (1.7%) |  | 130 (1.5%) | 16 (1.5%) |  | 129 (1.5%) | 9 (1.3%) |  | 133 (1.6%) | 9 (0.9%) |  |
| Primary care | 2,987 (35.6%) | 172 (27.1%) |  | 2,987 (35.6%) | 447 (42.3%) |  | 2,955 (35.2%) | 228 (36.0%) |  | 3,034 (36.2%) | 418 (39.6%) |  |
| **Cancer site, n (%)** |  |  |  |  |  |  |  |  |  |  |  |  |
| Cancer site for tumors (hematological malignancies vs non-GI solid tumors) | 405 (4.8%) | 86 (13.5%) | 0.305 | 405 (4.8%) | 101 (9.6%) | 0.184 | 436 (5.2%) | 40 (6.3%) | 0.049 | 437 (5.2%) | 61 (5.8%) | 0.024 |
| **Cancer type, n (%)** |  |  |  |  |  |  |  |  |  |  |  |  |
| Metastatic Solid Tumor | 5,419 (64.6%) | 218 (34.3%) | 0.635 | 5,419 (64.6%) | 419 (39.7%) | 0.515 | 5,284 (63.0%) | 392 (61.8%) | 0.025 | 5,237 (62.4%) | 663 (62.8%) | 0.008 |
| Cancer site for tumors (GI solid tumors vs non-GI solid tumors) | 3,000 (35.8%) | 127 (20.0%) | 0.357 | 3,000 (35.8%) | 187 (17.7%) | 0.417 | 2,930 (34.9%) | 223 (35.1%) | 0.003 | 2,862 (34.1%) | 356 (33.7%) | 0.008 |
| non-GI cancer | 4,983 (59.4%) | 422 (66.5%) | 0.146 | 4,983 (59.4%) | 768 (72.7%) | 0.284 | 5,022 (59.9%) | 372 (58.6%) | 0.026 | 5,089 (60.7%) | 639 (60.5%) | 0.003 |
| **Cancer risk type, n (%)** |  |  |  |  |  |  |  |  |  |  |  |  |
| VTE risk (High or very high vs other) | 4,132 (49.3%) | 231 (36.4%) | 0.263 | 4,132 (49.3%) | 379 (35.9%) | 0.273 | 4,082 (48.7%) | 296 (46.7%) | 0.040 | 4,046 (48.2%) | 530 (50.2%) | 0.038 |
| Other cancers | 4,256 (50.7%) | 404 (63.6%) | 0.263 | 4,256 (50.7%) | 677 (64.1%) | 0.273 | 4,306 (51.3%) | 339 (53.3%) | 0.040 | 4,342 (51.8%) | 526 (49.8%) | 0.038 |
| **Cancer site prior to and on the index date, n (%)** |  |  |  |  |  |  |  |  |  |  |  |  |
| Leukemia | 86 (1.0%) | 38 (6.0%) | 0.272 | 86 (1.0%) | 44 (4.2%) | 0.199 | 94 (1.1%) | 16 (2.6%) | 0.107 | 96 (1.1%) | 22 (2.1%) | 0.075 |
| Multiple Myeloma | 122 (1.5%) | 20 (3.1%) | 0.113 | 122 (1.5%) | 26 (2.5%) | 0.073 | 134 (1.6%) | 8 (1.3%) | 0.024 | 138 (1.6%) | 13 (1.3%) | 0.033 |
| Bladder Cancer | 323 (3.9%) | 31 (4.9%) | 0.050 | 323 (3.9%) | 57 (5.4%) | 0.074 | 327 (3.9%) | 27 (4.3%) | 0.019 | 332 (4.0%) | 59 (5.6%) | 0.075 |
| Brain Cancer | 501 (6.0%) | 21 (3.3%) | 0.127 | 501 (6.0%) | 42 (4.0%) | 0.092 | 496 (5.9%) | 23 (3.7%) | 0.106 | 497 (5.9%) | 57 (5.4%) | 0.024 |
| Gynecologic Cancer | 779 (9.3%) | 30 (4.7%) | 0.179 | 779 (9.3%) | 66 (6.3%) | 0.114 | 763 (9.1%) | 46 (7.2%) | 0.069 | 755 (9.0%) | 99 (9.3%) | 0.011 |
| Lung Cancer | 1,417 (16.9%) | 82 (12.9%) | 0.112 | 1,417 (16.9%) | 138 (13.1%) | 0.107 | 1,399 (16.7%) | 107 (16.9%) | 0.006 | 1,392 (16.6%) | 181 (17.1%) | 0.014 |
| Lymphoma | 279 (3.3%) | 28 (4.4%) | 0.056 | 279 (3.3%) | 35 (3.3%) | 0.001 | 291 (3.5%) | 23 (3.6%) | 0.008 | 287 (3.4%) | 37 (3.5%) | 0.003 |
| Urinary Tract Cancer | 231 (2.8%) | 25 (3.9%) | 0.066 | 231 (2.8%) | 24 (2.3%) | 0.031 | 230 (2.7%) | 30 (4.7%) | 0.102 | 230 (2.7%) | 30 (2.8%) | 0.003 |
| Testis Cancer | 20 (0.2%) | <5 | 0.039 | 20 (0.2%) | <5 | 0.009 | 19 (0.2%) | <5 | 0.067 | 19 (0.2%) | 6 (0.6%) | 0.059 |
| Prostate Cancer | 577 (6.9%) | 117 (18.4%) | 0.353 | 577 (6.9%) | 183 (17.3%) | 0.325 | 601 (7.2%) | 70 (11.0%) | 0.133 | 624 (7.4%) | 104 (9.8%) | 0.084 |
| Digestive Organ Cancer | 3,010 (35.9%) | 127 (20.0%) | 0.360 | 3,010 (35.9%) | 187 (17.7%) | 0.419 | 2,940 (35.0%) | 223 (35.1%) | 0.000 | 2,872 (34.2%) | 356 (33.7%) | 0.011 |
| Upper GI Cancer | 698 (8.3%) | 14 (2.2%) | 0.277 | 698 (8.3%) | 30 (2.8%) | 0.240 | 685 (8.2%) | 28 (4.5%) | 0.152 | 668 (8.0%) | 56 (5.3%) | 0.106 |
| Lower GI Cancer | 1,475 (17.6%) | 84 (13.2%) | 0.121 | 1,475 (17.6%) | 113 (10.7%) | 0.199 | 1,448 (17.3%) | 134 (21.1%) | 0.096 | 1,420 (16.9%) | 197 (18.7%) | 0.046 |
| Pancreatic Cancer | 511 (6.1%) | 16 (2.5%) | 0.177 | 511 (6.1%) | 23 (2.2%) | 0.198 | 490 (5.8%) | 39 (6.2%) | 0.014 | 474 (5.7%) | 64 (6.0%) | 0.015 |
| Stomach Cancer | 349 (4.2%) | 5 (0.8%) | 0.218 | 349 (4.2%) | 12 (1.1%) | 0.189 | 338 (4.0%) | 12 (1.8%) | 0.131 | 327 (3.9%) | 31 (2.9%) | 0.055 |
| Breast Cancer | 1,152 (13.7%) | 83 (13.1%) | 0.019 | 1,152 (13.7%) | 152 (14.4%) | 0.019 | 1,163 (13.9%) | 81 (12.8%) | 0.031 | 1,184 (14.1%) | 133 (12.6%) | 0.045 |
| Lip Oral Pharynx Cancer | 90 (1.1%) | <5 | 0.091 | 90 (1.1%) | 12 (1.1%) | 0.006 | 92 (1.1%) | <5 | 0.128 | 95 (1.1%) | 12 (1.1%) | 0.004 |
| Bone Cancer | 120 (1.4%) | 12 (1.9%) | 0.036 | 120 (1.4%) | 18 (1.7%) | 0.022 | 120 (1.4%) | 15 (2.3%) | 0.065 | 122 (1.4%) | 17 (1.6%) | 0.013 |
| Mesothelial Cancer | 257 (3.1%) | 13 (2.0%) | 0.064 | 257 (3.1%) | 24 (2.3%) | 0.049 | 263 (3.1%) | 12 (2.0%) | 0.075 | 266 (3.2%) | 30 (2.9%) | 0.019 |
| Thyroid Endocrine Cancer | 34 (0.4%) | <5 | 0.031 | 34 (0.4%) | <5 | 0.004 | 34 (0.4%) | 5 (0.7%) | 0.044 | 35 (0.4%) | 8 (0.8%) | 0.048 |
| Melanoma | 86 (1.0%) | 12 (1.9%) | 0.072 | 86 (1.0%) | 23 (2.2%) | 0.092 | 87 (1.0%) | 9 (1.4%) | 0.036 | 88 (1.1%) | 15 (1.4%) | 0.030 |
| Other Cancer | 5,410 (64.5%) | 248 (39.1%) | 0.527 | 5,410 (64.5%) | 493 (46.7%) | 0.364 | 5,294 (63.1%) | 375 (59.0%) | 0.084 | 5,254 (62.6%) | 653 (61.8%) | 0.017 |

Abbreviations: CCI: Charlson Comorbidity Index; COPD: chronic obstructive pulmonary disease; GI: gastrointestinal; IPTW: inverse probability of treatment weighting; LMWH: low-molecular weight heparin; NSAID: non-steroidal inti-inflammatory drug; VTE: venous thromboembolism

**S4.2. Baseline characteristics before and after IPTW: DOAC vs. LMWH, patients with active cancer (Sweden)**

|  | **Pre-IPTW** | | | | | | **Post IPTW** | | | | | |
| --- | --- | --- | --- | --- | --- | --- | --- | --- | --- | --- | --- | --- |
| **LMWH + Apixaban** | | | **LMWH + Rivaroxaban** | | | **LMWH + Apixaban** | | | **LMWH + Rivaroxaban** | | |
| **Measure** | **LMWH N = 12,066** | **Apixaban N = 663** | **Standardized Difference for Unweighted Study Cohort** | **LMWH N = 12,066** | **Rivaroxaban N = 779** | **Standardized Difference for Unweighted Study Cohort** | **LMWH N = 12,066** | **Apixaban N = 663** | **Standardized Difference for Weighted Study Cohort** | **LMWH N = 12,066** | **Rivaroxaban N = 779** | **Standardized Difference for Weighted Study Cohort** |
| **Age at index (years)** |  |  | **0.356** |  |  | **0.285** |  |  | **0.020** |  |  | **0.029** |
| Mean (SD) | 68.1 (12.2) | 72.3 (11.3) |  | 68.1 (12.2) | 71.4 (11.1) |  | 68.2 (12.1) | 68.5 (12.5) |  | 68.2 (12.1) | 68.6 (12.1) |  |
| Median (Q1-Q3) | 70 (62 - 76) | 74 (66 - 80) |  | 70 (62 - 76) | 72 (66 - 79) |  | 70 (62 - 76) | 70 (62 - 77) |  | 70 (62 - 76) | 70 (62 - 77) |  |
| Range (min-max) | 18 - 100 | 26 - 97 |  | 18 - 100 | 18 - 95 |  | 18 - 100 | 26 - 97 |  | 18 - 100 | 18 - 95 |  |
| **Age groups, n (%)** |  |  |  |  |  |  |  |  |  |  |  |  |
| 18-54 years | 1,556 (12.9%) | 49 (7.4%) | 0.183 | 1,556 (12.9%) | 59 (7.6%) | 0.176 | 1,525 (12.6%) | 91 (13.8%) | 0.033 | 1,528 (12.7%) | 98 (12.5%) | 0.004 |
| 55-64 years | 2,331 (19.3%) | 82 (12.4%) | 0.191 | 2,331 (19.3%) | 113 (14.5%) | 0.129 | 2,304 (19.1%) | 112 (16.9%) | 0.058 | 2,305 (19.1%) | 159 (20.4%) | 0.032 |
| 65-74 years | 4,506 (37.3%) | 230 (34.7%) | 0.055 | 4,506 (37.3%) | 290 (37.2%) | 0.002 | 4,504 (37.3%) | 237 (35.7%) | 0.034 | 4,503 (37.3%) | 257 (33.0%) | 0.091 |
| 75-79 years | 1,797 (14.9%) | 125 (18.9%) | 0.106 | 1,797 (14.9%) | 142 (18.2%) | 0.090 | 1,813 (15.0%) | 107 (16.1%) | 0.029 | 1,812 (15.0%) | 131 (16.8%) | 0.049 |
| ≥80 years | 1,876 (15.5%) | 177 (26.7%) | 0.276 | 1,876 (15.5%) | 175 (22.5%) | 0.177 | 1,919 (15.9%) | 117 (17.6%) | 0.046 | 1,917 (15.9%) | 135 (17.3%) | 0.038 |
| **Gender, n (%)** |  |  | **0.188** |  |  | **0.265** |  |  | **0.016** |  |  | **0.034** |
| Male | 5,587 (46.3%) | 369 (55.7%) |  | 5,587 (46.3%) | 463 (59.4%) |  | 5,630 (46.7%) | 304 (45.9%) |  | 5,656 (46.9%) | 352 (45.2%) |  |
| Female | 6,479 (53.7%) | 294 (44.3%) |  | 6,479 (53.7%) | 316 (40.6%) |  | 6,436 (53.3%) | 359 (54.1%) |  | 6,410 (53.1%) | 427 (54.8%) |  |
| **Index VTE diagnosis, n (%)** |  |  | **0.153** |  |  | **0.031** |  |  | **0.090** |  |  | **0.113** |
| DVT | 5,267 (43.7%) | 240 (36.2%) |  | 5,267 (43.7%) | 328 (42.1%) |  | 5,232 (43.4%) | 258 (38.9%) |  | 5,257 (43.6%) | 296 (38.0%) |  |
| PE (with or without DVT) | 6,799 (56.3%) | 423 (63.8%) |  | 6,799 (56.3%) | 451 (57.9%) |  | 6,834 (56.6%) | 405 (61.1%) |  | 6,809 (56.4%) | 483 (62.0%) |  |
| **Baseline CCI** |  |  | **0.593** |  |  | **0.662** |  |  | **0.007** |  |  | **0.008** |
| Mean (SD) | 4.7 (2.1) | 3.5 (1.9) |  | 4.7 (2.1) | 3.4 (1.9) |  | 4.6 (2.1) | 4.7 (2.2) |  | 4.6 (2.1) | 4.6 (2.2) |  |
| Median (Q1-Q3) | 6 (2 - 6) | 2 (2 - 5) |  | 6 (2 - 6) | 2 (2 - 5) |  | 6 (2 - 6) | 6 (2 - 6) |  | 6 (2 - 6) | 6 (2 - 6) |  |
| Range (min-max) | 2 - 14 | 2 - 11 |  | 2 - 14 | 2 - 11 |  | 2 - 14 | 2 - 11 |  | 2 - 14 | 2 - 11 |  |
| **Selected CCI comorbidities during baseline** |  |  |  |  |  |  |  |  |  |  |  |  |
| Myocardial infarction any time before index date | 360 (3.0%) | 28 (4.2%) | 0.067 | 360 (3.0%) | 39 (5.0%) | 0.103 | 365 (3.0%) | 22 (3.3%) | 0.018 | 370 (3.1%) | 28 (3.6%) | 0.029 |
| Congestive heart failure any time before index date | 553 (4.6%) | 56 (8.4%) | 0.157 | 553 (4.6%) | 56 (7.2%) | 0.111 | 568 (4.7%) | 36 (5.4%) | 0.033 | 566 (4.7%) | 45 (5.8%) | 0.048 |
| Peripheral vascular disease any time before index date | 523 (4.3%) | 29 (4.4%) | 0.002 | 523 (4.3%) | 43 (5.5%) | 0.055 | 523 (4.3%) | 27 (4.0%) | 0.015 | 528 (4.4%) | 34 (4.4%) | 0.000 |
| Cerebrovascular disease any time before index date | 862 (7.1%) | 59 (8.9%) | 0.065 | 862 (7.1%) | 77 (9.9%) | 0.098 | 869 (7.2%) | 51 (7.7%) | 0.018 | 873 (7.2%) | 67 (8.6%) | 0.051 |
| Dementia any time before index date | 139 (1.2%) | 17 (2.6%) | 0.105 | 139 (1.2%) | 18 (2.3%) | 0.089 | 144 (1.2%) | 10 (1.5%) | 0.030 | 144 (1.2%) | 11 (1.4%) | 0.016 |
| COPD and/or asthma any time before index date | 1,431 (11.9%) | 93 (14.0%) | 0.065 | 1,431 (11.9%) | 104 (13.4%) | 0.045 | 1,442 (12.0%) | 95 (14.4%) | 0.072 | 1,439 (11.9%) | 90 (11.5%) | 0.013 |
| Peptic ulcer disease any time before index date | 411 (3.4%) | 21 (3.2%) | 0.013 | 411 (3.4%) | 22 (2.8%) | 0.034 | 408 (3.4%) | 16 (2.4%) | 0.061 | 407 (3.4%) | 24 (3.1%) | 0.016 |
| Rheumatic disease any time before index date | 541 (4.5%) | 55 (8.3%) | 0.156 | 541 (4.5%) | 53 (6.8%) | 0.101 | 556 (4.6%) | 31 (4.7%) | 0.005 | 551 (4.6%) | 39 (5.1%) | 0.023 |
| Diabetes without chronic complication any time before index date | 1,198 (9.9%) | 62 (9.4%) | 0.020 | 1,198 (9.9%) | 71 (9.1%) | 0.028 | 1,194 (9.9%) | 52 (7.9%) | 0.071 | 1,194 (9.9%) | 83 (10.6%) | 0.023 |
| Diabetes with chronic complication any time before index date | 411 (3.4%) | 25 (3.8%) | 0.020 | 411 (3.4%) | 32 (4.1%) | 0.037 | 413 (3.4%) | 21 (3.2%) | 0.012 | 414 (3.4%) | 28 (3.6%) | 0.012 |
| Mild liver disease any time before index date | 121 (1.0%) | <5 | 0.065 | 121 (1.0%) | <5 | 0.056 | 122 (1.0%) | <5 | 0.100 | 122 (1.0%) | <5 | 0.090 |
| Moderate or severe liver disease any time before index date | 79 (0.7%) | <5 | 0.051 | 79 (0.7%) | <5 | 0.059 | 78 (0.6%) | 5 (0.7%) | 0.008 | 78 (0.6%) | <5 | 0.046 |
| Renal disease any time before index date | 677 (5.6%) | 39 (5.9%) | 0.012 | 677 (5.6%) | 40 (5.1%) | 0.021 | 679 (5.6%) | 39 (5.9%) | 0.013 | 677 (5.6%) | 72 (9.2%) | 0.138 |
| Hemiplegia or paraplegia any time before index date | 183 (1.5%) | 11 (1.7%) | 0.011 | 183 (1.5%) | 19 (2.4%) | 0.066 | 184 (1.5%) | 12 (1.8%) | 0.020 | 186 (1.5%) | 15 (1.9%) | 0.028 |
| AIDS/HIV any time before index date | 9 (0.07%) | 0 (0%) | 0.039 | 9 (0.07%) | 0 (0%) | 0.039 | 9 (0.07%) | 0 (0%) | 0.039 | 9 (0.08%) | 0 (0%) | 0.039 |
| **VTE related comorbidities during baseline, n (%)** |  |  |  |  |  |  |  |  |  |  |  |  |
| Prior bleeding any time before index date | 1,161 (9.6%) | 53 (8.0%) | 0.057 | 1,161 (9.6%) | 62 (8.0%) | 0.059 | 1,154 (9.6%) | 63 (9.5%) | 0.001 | 1,153 (9.6%) | 87 (11.1%) | 0.052 |
| Hypertension any time before index date | 7,350 (60.9%) | 435 (65.6%) | 0.098 | 7,350 (60.9%) | 500 (64.2%) | 0.068 | 7,371 (61.1%) | 414 (62.5%) | 0.029 | 7,364 (61.0%) | 482 (61.9%) | 0.017 |
| Sepsis three months before index date | 341 (2.8%) | 11 (1.7%) | 0.079 | 341 (2.8%) | 11 (1.4%) | 0.098 | 335 (2.8%) | 20 (2.9%) | 0.010 | 333 (2.8%) | 16 (2.0%) | 0.050 |
| Pneumonia three months before index date | 909 (7.5%) | 66 (10.0%) | 0.086 | 909 (7.5%) | 61 (7.8%) | 0.011 | 919 (7.6%) | 55 (8.2%) | 0.023 | 911 (7.5%) | 75 (9.6%) | 0.072 |
| Stroke three months before index date | 311 (2.6%) | 21 (3.2%) | 0.035 | 311 (2.6%) | 32 (4.1%) | 0.085 | 314 (2.6%) | 14 (2.1%) | 0.033 | 316 (2.6%) | 16 (2.0%) | 0.042 |
| Cardiac arrest three months before index date | 17 (0.1%) | 0 (0%) | 0.053 | 17 (0.1%) | <5 | 0.003 | 17 (0.1%) | 0 (0%) | 0.053 | 17 (0.1%) | <5 | 0.003 |
| Obesity any time before index date | 392 (3.2%) | 22 (3.3%) | 0.004 | 392 (3.2%) | 34 (4.4%) | 0.058 | 392 (3.2%) | 20 (3.0%) | 0.017 | 397 (3.3%) | 32 (4.1%) | 0.040 |
| Inflammatory Bowel Disease any time before index date | 191 (1.6%) | 8 (1.2%) | 0.032 | 191 (1.6%) | 17 (2.2%) | 0.044 | 189 (1.6%) | 8 (1.2%) | 0.029 | 193 (1.6%) | 13 (1.7%) | 0.006 |
| Varicose veins any time before index date | 327 (2.7%) | 25 (3.8%) | 0.060 | 327 (2.7%) | 22 (2.8%) | 0.007 | 332 (2.8%) | 24 (3.7%) | 0.053 | 328 (2.7%) | 20 (2.5%) | 0.011 |
| Ischemic heart disease/coronary artery disease any time before index date | 1,026 (8.5%) | 75 (11.3%) | 0.094 | 1,026 (8.5%) | 105 (13.5%) | 0.160 | 1,038 (8.6%) | 59 (9.0%) | 0.013 | 1,050 (8.7%) | 67 (8.6%) | 0.004 |
| Anemia any time before index date | 2,360 (19.6%) | 113 (17.0%) | 0.065 | 2,360 (19.6%) | 101 (13.0%) | 0.179 | 2,347 (19.5%) | 112 (16.9%) | 0.067 | 2,324 (19.3%) | 143 (18.4%) | 0.023 |
| Coagulation defects any time before index date | 321 (2.7%) | 22 (3.3%) | 0.039 | 321 (2.7%) | 24 (3.1%) | 0.025 | 324 (2.7%) | 17 (2.6%) | 0.007 | 324 (2.7%) | 21 (2.7%) | 0.001 |
| Dyspepsia any time before index date | 542 (4.5%) | 32 (4.8%) | 0.016 | 542 (4.5%) | 30 (3.9%) | 0.032 | 543 (4.5%) | 43 (6.5%) | 0.086 | 537 (4.5%) | 31 (3.9%) | 0.026 |
| Hyperlipidemia any time before index date | 960 (8.0%) | 59 (8.9%) | 0.034 | 960 (8.0%) | 85 (10.9%) | 0.101 | 965 (8.0%) | 45 (6.8%) | 0.045 | 975 (8.1%) | 72 (9.2%) | 0.041 |
| Sleep apnea any time before index date | 341 (2.8%) | 27 (4.1%) | 0.068 | 341 (2.8%) | 32 (4.1%) | 0.070 | 346 (2.9%) | 22 (3.3%) | 0.025 | 347 (2.9%) | 22 (2.9%) | 0.000 |
| Spinal cord injury any time before index date | <5 | <5 | 0.043 | <5 | 0 (0%) | 0.022 | <5 | <5 | 0.085 | <5 | 0 (0%) | 0.022 |
| Thrombophilia any time before index date | 115 (1.0%) | 30 (4.5%) | 0.220 | 115 (1.0%) | 37 (4.7%) | 0.230 | 123 (1.0%) | 6 (0.9%) | 0.007 | 124 (1.0%) | 11 (1.4%) | 0.038 |
| Falls any time before index date | 2,411 (20.0%) | 172 (25.9%) | 0.142 | 2,411 (20.0%) | 205 (26.3%) | 0.151 | 2,435 (20.2%) | 153 (23.0%) | 0.069 | 2,440 (20.2%) | 168 (21.5%) | 0.032 |
| **Medication within 90 days prior to index date, n (%)** |  |  |  |  |  |  |  |  |  |  |  |  |
| Platelet aggregation inhibitors three months before index date | 1,554 (12.9%) | 134 (20.2%) | 0.198 | 1,554 (12.9%) | 156 (20.0%) | 0.194 | 1,581 (13.1%) | 92 (13.9%) | 0.023 | 1,585 (13.1%) | 111 (14.3%) | 0.033 |
| NSAIDs three months before index date | 1,372 (11.4%) | 60 (9.0%) | 0.077 | 1,372 (11.4%) | 76 (9.8%) | 0.053 | 1,361 (11.3%) | 77 (11.6%) | 0.011 | 1,363 (11.3%) | 80 (10.3%) | 0.032 |
| Estrogen-based contraceptives and estrogen treatment for menopausal symptoms three months before index date | 395 (3.3%) | 21 (3.2%) | 0.006 | 395 (3.3%) | 22 (2.8%) | 0.026 | 394 (3.3%) | 31 (4.7%) | 0.075 | 392 (3.3%) | 29 (3.8%) | 0.029 |
| **Diagnostic setting, n (%)** |  |  | **0.094** |  |  | **0.150** |  |  | **0.059** |  |  | **0.010** |
| Inpatient | 7,759 (64.3%) | 396 (59.7%) |  | 7,759 (64.3%) | 444 (57.0%) |  | 7,733 (64.1%) | 406 (61.2%) |  | 7,718 (64.0%) | 495 (63.5%) |  |
| Outpatient | 4,307 (35.7%) | 267 (40.3%) |  | 4,307 (35.7%) | 335 (43.0%) |  | 4,333 (35.9%) | 257 (38.8%) |  | 4,348 (36.0%) | 284 (36.5%) |  |
| **Cancer site, n (%)** |  |  |  |  |  |  |  |  |  |  |  |  |
| Hematological malignancies | 1,039 (8.6%) | 160 (24.1%) | 0.429 | 1,039 (8.6%) | 192 (24.6%) | 0.441 | 1,102 (9.1%) | 71 (10.7%) | 0.051 | 1,115 (9.2%) | 86 (11.0%) | 0.058 |
| **Cancer type, n (%)** |  |  |  |  |  |  |  |  |  |  |  |  |
| Metastatic Solid Tumor any time before index date | 6,766 (56.1%) | 148 (22.3%) | 0.737 | 6,766 (56.1%) | 157 (20.2%) | 0.796 | 6,592 (54.6%) | 359 (54.1%) | 0.010 | 6,549 (54.3%) | 418 (53.7%) | 0.011 |
| GI cancer | 3,460 (28.7%) | 79 (11.9%) | 0.426 | 3,460 (28.7%) | 94 (12.1%) | 0.421 | 3,375 (28.0%) | 167 (25.2%) | 0.063 | 3,363 (27.9%) | 217 (27.9%) | 0.001 |
| non-GI cancer | 7,567 (62.7%) | 424 (64.0%) | 0.026 | 7,567 (62.7%) | 493 (63.3%) | 0.012 | 7,589 (62.9%) | 425 (64.2%) | 0.026 | 7,588 (62.9%) | 476 (61.1%) | 0.036 |
| **Cancer risk type, n (%)** |  |  |  |  |  |  |  |  |  |  |  |  |
| High or very high risk for VTE | 5,563 (46.1%) | 198 (29.9%) | 0.339 | 5,563 (46.1%) | 249 (32.0%) | 0.293 | 5,490 (45.5%) | 299 (45.1%) | 0.008 | 5,493 (45.5%) | 337 (43.2%) | 0.046 |
| Other cancers | 6,503 (53.9%) | 465 (70.1%) | 0.339 | 6,503 (53.9%) | 530 (68.0%) | 0.293 | 6,576 (54.5%) | 364 (54.9%) | 0.008 | 6,573 (54.5%) | 442 (56.8%) | 0.046 |
| **Cancer site prior to and on the index date, n (%)** |  |  |  |  |  |  |  |  |  |  |  |  |
| Leukemia | 279 (2.3%) | 45 (6.8%) | 0.216 | 279 (2.3%) | 60 (7.7%) | 0.249 | 301 (2.5%) | 13 (2.0%) | 0.035 | 304 (2.5%) | 19 (2.4%) | 0.008 |
| Multiple myeloma | 247 (2.0%) | 38 (5.7%) | 0.191 | 247 (2.0%) | 34 (4.4%) | 0.132 | 269 (2.2%) | 13 (1.9%) | 0.022 | 271 (2.2%) | 19 (2.5%) | 0.015 |
| Bladder cancer | 438 (3.6%) | 34 (5.1%) | 0.073 | 438 (3.6%) | 51 (6.5%) | 0.133 | 437 (3.6%) | 34 (5.1%) | 0.071 | 438 (3.6%) | 59 (7.5%) | 0.170 |
| Brain tumor | 611 (5.1%) | 17 (2.6%) | 0.131 | 611 (5.1%) | 35 (4.5%) | 0.027 | 609 (5.1%) | 23 (3.4%) | 0.082 | 615 (5.1%) | 46 (5.9%) | 0.036 |
| Gynecologic cancer | 837 (6.9%) | 20 (3.0%) | 0.181 | 837 (6.9%) | 28 (3.6%) | 0.150 | 821 (6.8%) | 47 (7.1%) | 0.011 | 818 (6.8%) | 46 (5.9%) | 0.034 |
| Lung cancer | 1,644 (13.6%) | 53 (8.0%) | 0.182 | 1,644 (13.6%) | 41 (5.3%) | 0.289 | 1,627 (13.5%) | 106 (15.9%) | 0.069 | 1,624 (13.5%) | 86 (11.1%) | 0.072 |
| Lymphoma | 554 (4.6%) | 53 (8.0%) | 0.140 | 554 (4.6%) | 69 (8.9%) | 0.171 | 568 (4.7%) | 40 (6.1%) | 0.061 | 575 (4.8%) | 45 (5.8%) | 0.046 |
| Urinary tract cancer | 333 (2.8%) | 10 (1.5%) | 0.087 | 333 (2.8%) | 15 (1.9%) | 0.055 | 327 (2.7%) | 8 (1.3%) | 0.104 | 326 (2.7%) | 25 (3.2%) | 0.030 |
| Testis cancer | 87 (0.7%) | <5 | 0.015 | 87 (0.7%) | <5 | 0.067 | 84 (0.7%) | 9 (1.3%) | 0.060 | 84 (0.7%) | 6 (0.8%) | 0.013 |
| Prostate cancer | 1,106 (9.2%) | 162 (24.4%) | 0.417 | 1,106 (9.2%) | 199 (25.5%) | 0.443 | 1,148 (9.5%) | 88 (13.2%) | 0.117 | 1,155 (9.6%) | 94 (12.1%) | 0.081 |
| Digestive organ cancer | 3,460 (28.7%) | 79 (11.9%) | 0.426 | 3,460 (28.7%) | 94 (12.1%) | 0.421 | 3,376 (28.0%) | 167 (25.2%) | 0.063 | 3,364 (27.9%) | 217 (27.9%) | 0.000 |
| Upper GI cancer | 431 (3.6%) | 0 (0%) | 0.272 | 431 (3.6%) | <5 | 0.217 | 420 (3.5%) | 0 (0%) | 0.268 | 418 (3.5%) | 10 (1.3%) | 0.141 |
| Lower GI cancer | 1,879 (15.6%) | 68 (10.3%) | 0.159 | 1,879 (15.6%) | 78 (10.0%) | 0.167 | 1,842 (15.3%) | 131 (19.7%) | 0.117 | 1,836 (15.2%) | 173 (22.2%) | 0.179 |
| Pancreatic cancer | 846 (7.0%) | 9 (1.4%) | 0.285 | 846 (7.0%) | 7 (0.9%) | 0.318 | 815 (6.8%) | 32 (4.8%) | 0.085 | 811 (6.7%) | 25 (3.2%) | 0.164 |
| Stomach cancer | 296 (2.5%) | 0 (0%) | 0.224 | 296 (2.5%) | <5 | 0.176 | 285 (2.4%) | 0 (0%) | 0.220 | 284 (2.4%) | 9 (1.2%) | 0.090 |
| Breast cancer | 1,218 (10.1%) | 75 (11.3%) | 0.039 | 1,218 (10.1%) | 67 (8.6%) | 0.051 | 1,234 (10.2%) | 69 (10.5%) | 0.008 | 1,233 (10.2%) | 71 (9.1%) | 0.037 |
| Lip, oral cavity and pharynx cancer | 131 (1.1%) | 9 (1.4%) | 0.025 | 131 (1.1%) | 7 (0.9%) | 0.019 | 134 (1.1%) | 7 (1.0%) | 0.009 | 134 (1.1%) | 8 (1.1%) | 0.002 |
| Bone cancer | 48 (0.4%) | 5 (0.8%) | 0.047 | 48 (0.4%) | <5 | 0.053 | 49 (0.4%) | <5 | 0.025 | 49 (0.4%) | <5 | 0.007 |
| Mesothelial cancer | 251 (2.1%) | 8 (1.2%) | 0.069 | 251 (2.1%) | 6 (0.8%) | 0.111 | 256 (2.1%) | 8 (1.2%) | 0.073 | 256 (2.1%) | 6 (0.7%) | 0.119 |
| Thyroid and endocrine cancer | 57 (0.5%) | <5 | 0.018 | 57 (0.5%) | 7 (0.9%) | 0.052 | 58 (0.5%) | 5 (0.7%) | 0.027 | 58 (0.5%) | 12 (1.6%) | 0.111 |
| Melanoma | 207 (1.7%) | 15 (2.3%) | 0.039 | 207 (1.7%) | 25 (3.2%) | 0.096 | 209 (1.7%) | 8 (1.2%) | 0.041 | 208 (1.7%) | 14 (1.9%) | 0.010 |
| Other cancer | 5,638 (46.7%) | 97 (14.6%) | 0.742 | 5,638 (46.7%) | 98 (12.6%) | 0.806 | 5,503 (45.6%) | 230 (34.7%) | 0.225 | 5,468 (45.3%) | 243 (31.2%) | 0.293 |

Abbreviations: CCI: Charlson Comorbidity Index; COPD: chronic obstructive pulmonary disease; GI: gastrointestinal; IPTW: inverse probability of treatment weighting; LMWH: low-molecular weight heparin; NSAID: non-steroidal inti-inflammatory drug; VTE: venous thromboembolism

**S4.3. Baseline characteristics before and after IPTW: DOAC vs. LMWH, patients with active cancer (Germany - AOK)**

|  | **Before IPTW** | | | | | | **After IPTW** | | | | | |
| --- | --- | --- | --- | --- | --- | --- | --- | --- | --- | --- | --- | --- |
| **LMWH + Apixaban** | | | **LMWH + Rivaroxaban** | | | **LMWH + Apixaban** | | | **LMWH + Rivaroxaban** | | |
| **Measure** | **LMWH (N = 3192)** | **Apixaban (N = 461)** | **Standardized Difference for Unweighted Study Cohort** | **LMWH (N = 3192)** | **Rivaroxaban (N = 1225)** | **Standardized Difference for Unweighted Study Cohort** | **LMWH (N = 3192.0)** | **Apixaban (N = 461.0)** | **Standardized Difference for Weighted Study Cohort** | **LMWH (N = 3166.23)** | **Rivaroxaban (N = 1250.77)** | **Standardized Difference for Weighted Study Cohort** |
| **Age at index date (in years)** |  |  |  |  |  |  |  |  |  |  |  |  |
| Mean (SD) | 69.70 (13.15) | 75.27 (11.71) | 0.447 | 69.70 (13.15) | 72.79 (11.83) | 0.247 | 70.26 (13.07) | 70.17 (13.27) | 0.007 | 70.56 (13.03) | 70.64 (12.61) | 0.007 |
| Median (Range) | 71.5 (22.1 - 100.4) | 77.9 (23.1 - 97.9) |  | 71.5 (22.1 - 100.4) | 75.1 (23.6 - 96.2) |  | 72.1 (22.2 - 100.4) | 71.7 (23.1 - 97.9) |  | 72.6 (22.2 - 100.4) | 72.4 (25.4 - 96.1) |  |
| Interquartile range | 60.6 - 79.4 | 67.8 - 83.6 |  | 60.6 - 79.4 | 65.3 - 81.3 |  | 61.3 - 79.8 | 61.3 - 79.7 |  | 61.8 - 80.1 | 62.8 - 79.9 |  |
| **Age groups, n (%)** |  |  |  |  |  |  |  |  |  |  |  |  |
| 18-54 years | 450 (14.1) | 28 (6.1) | 0.269 | 450 (14.1) | 89 (7.3) | 0.223 | 420.6 (13.2) | 61.7 (13.4) | 0.006 | 403.3 (12.7) | 133.2 (10.7) | 0.065 |
| 55-64 years | 668 (20.9) | 56 (12.1) | 0.238 | 668 (20.9) | 214 (17.5) | 0.088 | 642.9 (20.1) | 86.4 (18.7) | 0.036 | 623.2 (19.7) | 254.0 (20.3) | 0.016 |
| 65-74 years | 775 (24.3) | 101 (21.9) | 0.056 | 775 (24.3) | 307 (25.1) | 0.018 | 773.0 (24.2) | 111.4 (24.2) | 0.001 | 767.3 (24.2) | 332.1 (26.6) | 0.053 |
| 75-79 years | 561 (17.6) | 96 (20.8) | 0.083 | 561 (17.6) | 252 (20.6) | 0.076 | 573.0 (18.0) | 89.4 (19.4) | 0.037 | 572.5 (18.1) | 221.8 (17.7) | 0.009 |
| ≥80 years | 738 (23.1) | 180 (39.0) | 0.349 | 738 (23.1) | 363 (29.6) | 0.148 | 782.5 (24.5) | 112.2 (24.3) | 0.004 | 800.0 (25.3) | 309.7 (24.8) | 0.012 |
| **Gender, n (%)** |  |  |  |  |  |  |  |  |  |  |  |  |
| Male | 1440 (45.1) | 239 (51.8) | 0.135 | 1440 (45.1) | 602 (49.1) | 0.081 | 1461.5 (45.8) | 219.4 (47.6) | 0.036 | 1461.7 (46.2) | 575.2 (46.0) | 0.004 |
| Female | 1752 (54.9) | 222 (48.2) | 0.135 | 1752 (54.9) | 623 (50.9) | 0.081 | 1730.5 (54.2) | 241.6 (52.4) | 0.036 | 1704.5 (53.8) | 675.6 (54.0) | 0.004 |
| Missing/unknown | 0 (0.0) | 0 (0.0) | NA | 0 (0.0) | 0 (0.0) | NA | 0 (0.0) | 0 (0.0) |  | 0 (0.0) | 0 (0.0) |  |
| **Index VTE diagnosis, n (%)** |  |  | 0.379 |  |  | 0.250 |  |  | 0.092 |  |  | 0.036 |
| DVT only | 2194 (68.7) | 234 (50.8) |  | 2194 (68.7) | 696 (56.8) |  | 2142.7 (67.1) | 320.2 (69.5) |  | 2081.4 (65.7) | 843.2 (67.4) |  |
| PE only | 616 (19.3) | 128 (27.8) |  | 616 (19.3) | 313 (25.6) |  | 645.9 (20.2) | 77.2 (16.7) |  | 665.4 (21.0) | 249.5 (19.9) |  |
| Both DVT and PE | 382 (12.0) | 99 (21.5) |  | 382 (12.0) | 216 (17.6) |  | 403.4 (12.6) | 63.7 (13.8) |  | 419.4 (13.2) | 158.1 (12.6) |  |
| **Prior bleeding, n (%)** |  |  |  |  |  |  |  |  |  |  |  |  |
| Yes | 736 (23.1) | 111 (24.1) | 0.024 | 736 (23.1) | 246 (20.1) | 0.072 | 738.0 (23.1) | 116.1 (25.2) | 0.048 | 707.8 (22.4) | 299.8 (24.0) | 0.038 |
| No | 2456 (76.9) | 350 (75.9) | 0.024 | 2456 (76.9) | 979 (79.9) | 0.072 | 2454.0 (76.9) | 344.9 (74.8) | 0.048 | 2458.4 (77.6) | 950.9 (76.0) | 0.038 |
| **Baseline CCI** |  |  |  |  |  |  |  |  |  |  |  |  |
| Mean (SD) | 6.15 (2.79) | 6.07 (2.75) | 0.028 | 6.15 (2.79) | 5.49 (2.68) | 0.244 | 6.14 (2.80) | 6.33 (2.75) | 0.066 | 5.98 (2.80) | 6.08 (2.74) | 0.037 |
| Median (Range) | 6.0 (2.0 - 18.0) | 6.0 (2.0 - 15.0) |  | 6.0 (2.0 - 18.0) | 5.0 (2.0 - 15.0) |  | 6.0 (2.0 - 18.0) | 6.0 (2.0 - 15.0) |  | 6.0 (2.0 - 18.0) | 6.0 (2.0 - 15.0) |  |
| Interquartile range | 4.0 - 8.0 | 4.0 - 8.0 |  | 4.0 - 8.0 | 3.0 - 7.0 |  | 4.0 - 8.0 | 4.0 - 8.0 |  | 4.0 - 8.0 | 4.0 - 8.0 |  |
| **Selected CCI comorbidities during baseline** |  |  |  |  |  |  |  |  |  |  |  |  |
| Myocardial infarction | 117 (3.7) | 18 (3.9) | 0.013 | 117 (3.7) | 46 (3.8) | 0.005 | 117.7 (3.7) | 14.5 (3.1) | 0.030 | 116.6 (3.7) | 44.6 (3.6) | 0.006 |
| Congestive heart failure | 801 (25.1) | 186 (40.3) | 0.329 | 801 (25.1) | 382 (31.2) | 0.136 | 846.2 (26.5) | 121.1 (26.3) | 0.006 | 846.4 (26.7) | 337.3 (27.0) | 0.005 |
| Peripheral vascular disease | 554 (17.4) | 95 (20.6) | 0.083 | 554 (17.4) | 229 (18.7) | 0.035 | 563.2 (17.6) | 74.8 (16.2) | 0.038 | 560.1 (17.7) | 228.4 (18.3) | 0.015 |
| Cerebrovascular disease | 523 (16.4) | 98 (21.3) | 0.125 | 523 (16.4) | 247 (20.2) | 0.098 | 537.0 (16.8) | 69.5 (15.1) | 0.048 | 552.6 (17.5) | 224.6 (18.0) | 0.013 |
| Dementia | 290 (9.1) | 69 (15.0) | 0.182 | 290 (9.1) | 153 (12.5) | 0.110 | 307.7 (9.6) | 49.6 (10.8) | 0.037 | 320.3 (10.1) | 120.3 (9.6) | 0.017 |
| COPD and/or asthma | 828 (25.9) | 148 (32.1) | 0.136 | 828 (25.9) | 354 (28.9) | 0.066 | 846.3 (26.5) | 128.8 (27.9) | 0.032 | 848.0 (26.8) | 333.4 (26.7) | 0.003 |
| Peptic ulcer disease | 183 (5.7) | 30 (6.5) | 0.032 | 183 (5.7) | 70 (5.7) | 0.001 | 185.9 (5.8) | 30.1 (6.5) | 0.029 | 180.2 (5.7) | 69.2 (5.5) | 0.007 |
| Rheumatic disease | 253 (7.9) | 51 (11.1) | 0.107 | 253 (7.9) | 113 (9.2) | 0.046 | 260.7 (8.2) | 31.6 (6.9) | 0.050 | 258.7 (8.2) | 99.7 (8.0) | 0.007 |
| Diabetes without chronic complication | 486 (15.2) | 72 (15.6) | 0.011 | 486 (15.2) | 188 (15.3) | 0.003 | 488.0 (15.3) | 76.7 (16.6) | 0.037 | 484.6 (15.3) | 200.9 (16.1) | 0.021 |
| Diabetes with chronic complication | 591 (18.5) | 99 (21.5) | 0.074 | 591 (18.5) | 220 (18.0) | 0.014 | 601.6 (18.8) | 87.9 (19.1) | 0.006 | 585.2 (18.5) | 233.5 (18.7) | 0.005 |
| Mild liver disease | 508 (15.9) | 76 (16.5) | 0.016 | 508 (15.9) | 196 (16.0) | 0.002 | 512.2 (16.0) | 84.3 (18.3) | 0.059 | 501.6 (15.8) | 200.1 (16.0) | 0.004 |
| Moderate or severe liver disease | 53 (1.7) | 6 (1.3) | 0.030 | 53 (1.7) | 16 (1.3) | 0.029 | 51.8 (1.6) | 5.2 (1.1) | 0.042 | 49.6 (1.6) | 19.0 (1.5) | 0.004 |
| Renal disease | 1071 (33.6) | 226 (49.0) | 0.318 | 1071 (33.6) | 475 (38.8) | 0.109 | 1118.8 (35.0) | 165.8 (36.0) | 0.019 | 1107.6 (35.0) | 442.3 (35.4) | 0.008 |
| Hemiplegia or paraplegia | 174 (5.5) | 22 (4.8) | 0.031 | 174 (5.5) | 55 (4.5) | 0.044 | 172.9 (5.4) | 27.5 (6.0) | 0.023 | 163.5 (5.2) | 75.1 (6.0) | 0.036 |
| AIDS/HIV | 1 (0.0) | 0 (0.0) | 0.025 | 1 (0.0) | 2 (0.2) | 0.042 | 1.0 (0.0) | 0.0 (0.0) | 0.025 | 1.1 (0.0) | 3.1 (0.2) | 0.057 |
| **VTE related comorbidities during baseline, n (%)** | NA | NA | NA | NA | NA | NA |  |  |  |  |  |  |
| Hypertension | 2459 (77.0) | 400 (86.8) | 0.255 | 2459 (77.0) | 997 (81.4) | 0.107 | 2491.3 (78.0) | 364.0 (79.0) | 0.022 | 2475.5 (78.2) | 975.8 (78.0) | 0.004 |
| Sepsis (three months before index date) | 208 (6.5) | 19 (4.1) | 0.107 | 208 (6.5) | 60 (4.9) | 0.070 | 200.5 (6.3) | 33.9 (7.3) | 0.042 | 194.2 (6.1) | 83.7 (6.7) | 0.023 |
| Pneumonia (three months before index date) | 451 (14.1) | 86 (18.7) | 0.122 | 451 (14.1) | 206 (16.8) | 0.074 | 462.4 (14.5) | 67.7 (14.7) | 0.006 | 465.0 (14.7) | 174.6 (14.0) | 0.021 |
| Stroke (three months before index date) | 119 (3.7) | 21 (4.6) | 0.042 | 119 (3.7) | 50 (4.1) | 0.018 | 120.6 (3.8) | 12.4 (2.7) | 0.061 | 121.0 (3.8) | 56.0 (4.5) | 0.033 |
| Cardiac arrest (three months before index date) | 8 (0.3) | 4 (0.9) | 0.083 | 8 (0.3) | 11 (0.9) | 0.086 | 8.0 (0.2) | 4.8 (1.0) | 0.098 | 8.1 (0.3) | 8.4 (0.7) | 0.062 |
| Obesity | 992 (31.1) | 162 (35.1) | 0.086 | 992 (31.1) | 389 (31.8) | 0.015 | 1003.4 (31.4) | 137.5 (29.8) | 0.035 | 994.2 (31.4) | 391.8 (31.3) | 0.002 |
| Inflammatory Bowel Disease | 53 (1.7) | 10 (2.2) | 0.037 | 53 (1.7) | 34 (2.8) | 0.076 | 53.9 (1.7) | 9.2 (2.0) | 0.022 | 63.2 (2.0) | 25.8 (2.1) | 0.005 |
| Varicose veins | 865 (27.1) | 133 (28.9) | 0.039 | 865 (27.1) | 334 (27.3) | 0.004 | 871.6 (27.3) | 129.6 (28.1) | 0.018 | 868.6 (27.4) | 356.7 (28.5) | 0.024 |
| Ischemic heart disease/coronary artery disease | 773 (24.2) | 149 (32.3) | 0.181 | 773 (24.2) | 360 (29.4) | 0.117 | 797.3 (25.0) | 117.0 (25.4) | 0.009 | 807.7 (25.5) | 328.7 (26.3) | 0.018 |
| Anemia | 934 (29.3) | 124 (26.9) | 0.053 | 934 (29.3) | 274 (22.4) | 0.158 | 926.8 (29.0) | 132.1 (28.7) | 0.008 | 868.3 (27.4) | 360.1 (28.8) | 0.030 |
| Coagulation defects | 464 (14.5) | 45 (9.8) | 0.147 | 464 (14.5) | 139 (11.3) | 0.095 | 448.4 (14.0) | 73.4 (15.9) | 0.052 | 432.6 (13.7) | 174.8 (14.0) | 0.009 |
| Dyspepsia | 584 (18.3) | 85 (18.4) | 0.004 | 584 (18.3) | 214 (17.5) | 0.022 | 583.4 (18.3) | 85.4 (18.5) | 0.006 | 570.7 (18.0) | 221.7 (17.7) | 0.008 |
| Hyperlipidemia | 1065 (33.4) | 174 (37.7) | 0.092 | 1065 (33.4) | 409 (33.4) | <0.001 | 1079.5 (33.8) | 158.4 (34.4) | 0.011 | 1059.5 (33.5) | 430.9 (34.5) | 0.021 |
| Sleep apnea | 134 (4.2) | 34 (7.4) | 0.136 | 134 (4.2) | 70 (5.7) | 0.070 | 143.7 (4.5) | 19.1 (4.2) | 0.017 | 143.8 (4.5) | 55.8 (4.5) | 0.004 |
| Spinal cord injury | 2 (0.1) | 0 (0.0) | 0.035 | 2 (0.1) | 2 (0.2) | 0.030 | 1.9 (0.1) | 0.0 (0.0) | 0.034 | 1.7 (0.1) | 2.4 (0.2) | 0.039 |
| Thrombophilia | 302 (9.5) | 35 (7.6) | 0.067 | 302 (9.5) | 108 (8.8) | 0.022 | 296.1 (9.3) | 53.7 (11.7) | 0.078 | 293.6 (9.3) | 113.9 (9.1) | 0.006 |
| Falls | N/A | N/A | N/A | N/A | N/A | N/A | N/A | N/A | N/A | N/A | N/A | N/A |
| **Medication within 90 days prior to index date, n (%)** |  |  |  |  |  |  |  |  |  |  |  |  |
| Platelet aggregation inhibitors | 227 (7.1) | 46 (10.0) | 0.103 | 227 (7.1) | 100 (8.2) | 0.040 | 236.1 (7.4) | 31.2 (6.8) | 0.024 | 231.8 (7.3) | 97.7 (7.8) | 0.018 |
| NSAIDs | 579 (18.1) | 79 (17.1) | 0.026 | 579 (18.1) | 206 (16.8) | 0.035 | 576.6 (18.1) | 93.5 (20.3) | 0.056 | 566.5 (17.9) | 230.1 (18.4) | 0.013 |
| Estrogen-based contraceptives and estrogen treatment for menopausal symptoms three months before index date | 24 (0.8) | 2 (0.4) | 0.041 | 24 (0.8) | 7 (0.6) | 0.022 | 23.4 (0.7) | 1.9 (0.4) | 0.043 | 23.7 (0.7) | 6.2 (0.5) | 0.032 |
| **Diagnostic setting, n (%)** |  |  |  |  |  |  |  |  |  |  |  |  |
| Inpatient | 1425 (44.6) | 237 (51.4) | 0.136 | 1425 (44.6) | 573 (46.8) | 0.043 | 1442.2 (45.2) | 210.0 (45.5) | 0.007 | 1424.5 (45.0) | 552.8 (44.2) | 0.016 |
| Outpatient | 1767 (55.4) | 224 (48.6) | 0.136 | 1767 (55.4) | 652 (53.2) | 0.043 | 1749.8 (54.8) | 251.0 (54.5) | 0.007 | 1741.7 (55.0) | 698.0 (55.8) | 0.016 |
| **Cancer site, n (%)** |  |  |  |  |  |  |  |  |  |  |  |  |
| Hematological malignancies | 256 (8.0) | 59 (12.8) | 0.157 | 256 (8.0) | 115 (9.4) | 0.049 | 271.7 (8.5) | 42.8 (9.3) | 0.027 | 268.1 (8.5) | 107.0 (8.6) | 0.003 |
| Non-GI solid tumors | 1912 (59.9) | 289 (62.7) | 0.057 | 1912 (59.9) | 833 (68.0) | 0.169 | 1920.2 (60.2) | 266.2 (57.7) | 0.049 | 1963.2 (62.0) | 772.7 (61.8) | 0.005 |
| **Cancer type, n (%)** |  |  |  |  |  |  |  |  |  |  |  |  |
| Metastatic solid tumor | 1687 (52.9) | 156 (33.8) | 0.391 | 1687 (52.9) | 366 (29.9) | 0.480 | 1627.2 (51.0) | 248.7 (54.0) | 0.060 | 1482.3 (46.8) | 610.6 (48.8) | 0.040 |
| GI cancer | 1024 (32.1) | 113 (24.5) | 0.169 | 1024 (32.1) | 277 (22.6) | 0.214 | 1000.2 (31.3) | 152.0 (33.0) | 0.035 | 934.9 (29.5) | 371.0 (29.7) | 0.003 |
| Non-GI cancer | 1912 (59.9) | 289 (62.7) | 0.057 | 1912 (59.9) | 833 (68.0) | 0.169 | 1920.2 (60.2) | 266.2 (57.7) | 0.049 | 1963.2 (62.0) | 772.7 (61.8) | 0.005 |
| **Cancer risk type, n (%)** |  |  |  |  |  |  |  |  |  |  |  |  |
| Very high/high risk for VTE | 1602 (50.2) | 181 (39.3) | 0.221 | 1602 (50.2) | 512 (41.8) | 0.169 | 1568.4 (49.1) | 235.5 (51.1) | 0.039 | 1520.1 (48.0) | 619.6 (49.5) | 0.031 |
| Other cancers | 1590 (49.8) | 280 (60.7) | 0.221 | 1590 (49.8) | 713 (58.2) | 0.169 | 1623.6 (50.9) | 225.5 (48.9) | 0.039 | 1646.1 (52.0) | 631.1 (50.5) | 0.031 |
| **Cancer site prior to and on the index date, n (%)** |  |  |  |  |  |  |  |  |  |  |  |  |
| Leukemia | 111 (3.5) | 30 (6.5) | 0.139 | 111 (3.5) | 59 (4.8) | 0.067 | 118.5 (3.7) | 20.0 (4.3) | 0.032 | 117.0 (3.7) | 53.5 (4.3) | 0.030 |
| Multiple myeloma | 77 (2.4) | 10 (2.2) | 0.016 | 77 (2.4) | 10 (0.8) | 0.127 | 80.2 (2.5) | 9.6 (2.1) | 0.028 | 78.4 (2.5) | 11.2 (0.9) | 0.123 |
| Bladder cancer | 198 (6.2) | 26 (5.6) | 0.024 | 198 (6.2) | 80 (6.5) | 0.013 | 200.0 (6.3) | 22.4 (4.9) | 0.062 | 201.2 (6.4) | 76.2 (6.1) | 0.011 |
| Brain tumor | 88 (2.8) | 9 (2.0) | 0.053 | 88 (2.8) | 18 (1.5) | 0.090 | 86.7 (2.7) | 10.8 (2.3) | 0.024 | 89.2 (2.8) | 19.6 (1.6) | 0.085 |
| Gynecologic cancer | 331 (10.4) | 23 (5.0) | 0.203 | 331 (10.4) | 74 (6.0) | 0.158 | 319.7 (10.0) | 41.5 (9.0) | 0.035 | 312.3 (9.9) | 98.2 (7.9) | 0.071 |
| Lung cancer | 333 (10.4) | 32 (6.9) | 0.124 | 333 (10.4) | 96 (7.8) | 0.090 | 327.5 (10.3) | 38.9 (8.4) | 0.063 | 315.6 (10.0) | 119.8 (9.6) | 0.013 |
| Lymphoma | 177 (5.5) | 32 (6.9) | 0.058 | 177 (5.5) | 68 (5.6) | <0.001 | 177.0 (5.5) | 32.3 (7.0) | 0.060 | 169.8 (5.4) | 80.6 (6.4) | 0.046 |
| Urinary tract cancer | 238 (7.5) | 37 (8.0) | 0.021 | 238 (7.5) | 119 (9.7) | 0.081 | 239.2 (7.5) | 30.8 (6.7) | 0.031 | 238.5 (7.5) | 113.3 (9.1) | 0.055 |
| Testis cancer | 36 (1.1) | 8 (1.7) | 0.051 | 36 (1.1) | 22 (1.8) | 0.056 | 33.7 (1.1) | 12.8 (2.8) | 0.126 | 32.2 (1.0) | 32.3 (2.6) | 0.118 |
| Prostate cancer | 314 (9.8) | 82 (17.8) | 0.232 | 314 (9.8) | 198 (16.2) | 0.189 | 333.5 (10.4) | 47.9 (10.4) | 0.002 | 361.6 (11.4) | 148.4 (11.9) | 0.014 |
| Digestive organ cancer | 1038 (32.5) | 115 (24.9) | 0.168 | 1038 (32.5) | 280 (22.9) | 0.217 | 1014.3 (31.8) | 155.6 (33.8) | 0.042 | 947.7 (29.9) | 376.2 (30.1) | 0.003 |
| Upper GI cancer | 198 (6.2) | 16 (3.5) | 0.128 | 198 (6.2) | 40 (3.3) | 0.139 | 191.7 (6.0) | 27.5 (6.0) | 0.001 | 177.3 (5.6) | 57.7 (4.6) | 0.045 |
| Lower GI cancer | 522 (16.4) | 65 (14.1) | 0.063 | 522 (16.4) | 179 (14.6) | 0.048 | 517.5 (16.2) | 60.8 (13.2) | 0.086 | 489.0 (15.4) | 219.0 (17.5) | 0.056 |
| Pancreatic cancer | 228 (7.1) | 23 (5.0) | 0.090 | 228 (7.1) | 43 (3.5) | 0.162 | 215.5 (6.8) | 47.9 (10.4) | 0.130 | 195.3 (6.2) | 78.8 (6.3) | 0.006 |
| Stomach cancer | 144 (4.5) | 11 (2.4) | 0.117 | 144 (4.5) | 34 (2.8) | 0.093 | 138.4 (4.3) | 19.3 (4.2) | 0.007 | 126.9 (4.0) | 48.3 (3.9) | 0.008 |
| Breast cancer | 474 (14.8) | 78 (16.9) | 0.057 | 474 (14.8) | 220 (18.0) | 0.084 | 475.1 (14.9) | 73.8 (16.0) | 0.031 | 490.7 (15.5) | 184.5 (14.8) | 0.021 |
| Lip, oral cavity and pharynx cancer | 91 (2.9) | 6 (1.3) | 0.109 | 91 (2.9) | 40 (3.3) | 0.024 | 90.6 (2.8) | 7.4 (1.6) | 0.084 | 91.0 (2.9) | 36.0 (2.9) | <0.001 |
| Bone cancer | 32 (1.0) | 1 (0.2) | 0.101 | 32 (1.0) | 10 (0.8) | 0.020 | 31.4 (1.0) | 0.6 (0.1) | 0.114 | 30.6 (1.0) | 14.4 (1.2) | 0.018 |
| Mesothelial cancer | 115 (3.6) | 4 (0.9) | 0.186 | 115 (3.6) | 23 (1.9) | 0.106 | 112.0 (3.5) | 4.1 (0.9) | 0.180 | 106.2 (3.4) | 33.8 (2.7) | 0.038 |
| Thyroid and endocrine cancer | 38 (1.2) | 2 (0.4) | 0.084 | 38 (1.2) | 15 (1.2) | 0.003 | 36.9 (1.2) | 1.3 (0.3) | 0.105 | 36.8 (1.2) | 12.2 (1.0) | 0.018 |
| Melanoma | 90 (2.8) | 18 (3.9) | 0.060 | 90 (2.8) | 29 (2.4) | 0.028 | 91.0 (2.9) | 12.1 (2.6) | 0.014 | 93.5 (3.0) | 22.5 (1.8) | 0.076 |
| Other cancer | 1721 (53.9) | 161 (34.9) | 0.389 | 1721 (53.9) | 379 (30.9) | 0.478 | 1663.1 (52.1) | 253.1 (54.9) | 0.056 | 1521.1 (48.0) | 620.0 (49.6) | 0.031 |

Abbreviations: CCI: Charlson Comorbidity Index; COPD: chronic obstructive pulmonary disease; GI: gastrointestinal; IPTW: inverse probability of treatment weighting; LMWH: low-molecular weight heparin; NSAID: non-steroidal inti-inflammatory drug; VTE: venous thromboembolism

**S4.4. Baseline characteristics before and after IPTW: DOAC vs. LMWH, patients with active cancer (Germany - GWQ)**

|  | **Before IPTW** | | | | | | **After IPTW** | | | | | |
| --- | --- | --- | --- | --- | --- | --- | --- | --- | --- | --- | --- | --- |
| **LMWH + Apixaban** | | | **LMWH + Rivaroxaban** | | | **LMWH + Apixaban** | | | **LMWH + Rivaroxaban** | | |
| **Measure** | **LMWH (N = 1615)** | **Apixaban (N = 561)** | **Standardized Difference for Unweighted Study Cohort** | **LMWH (N = 1615)** | **Rivaroxaban (N = 869)** | **Standardized Difference for Unweighted Study Cohort** | **LMWH (N = 1605.23)** | **Apixaban (N = 570.77)** | **Standardized Difference for Weighted Study Cohort** | **LMWH (N = 1605.05)** | **Rivaroxaban (N = 878.95)** | **Standardized Difference for Weighted Study Cohort** |
| **Age at index date (in years)** |  |  |  |  |  |  |  |  |  |  |  |  |
| Mean (SD) | 62.91 (11.94) | 67.96 (12.02) | 0.450 | 62.91 (11.94) | 66.5 (12.5) | 0.300 | 63.54 (12.91) | 63.47 (12.77) | 0.006 | 63.40 (12.87) | 63.15 (13.39) | 0.019 |
| Median (Range) | 62.5 (32.5 - 96.5) | 69.5 (33.5 - 96.5) |  | 62.5 (32.5 - 96.5) | 66.5 (33.5 - 96.5) |  | 63.5 (32.5 - 96.5) | 63.5 (33.5 - 96.0) |  | 63.5 (32.5 - 96.5) | 63.5 (33.5 - 96.5) |  |
| Interquartile range | 54.5 - 71.5 | 60.5 - 76.5 |  | 54.5 - 71.5 | 57.5 - 76.5 |  | 54.5 - 73.5 | 55.5 - 73.5 |  | 54.5 - 73.5 | 54.0 - 73.5 |  |
| **Age groups, n (%)** |  |  |  |  |  |  |  |  |  |  |  |  |
| 18-54 years | 458 (28.4) | 81 (14.4) | 0.344 | 458 (28.4) | 174 (20.0) | 0.196 | 403.8 (25.2) | 136.0 (23.8) | 0.031 | 409.3 (25.5) | 236.4 (26.9) | 0.032 |
| 55-64 years | 480 (29.7) | 133 (23.7) | 0.136 | 480 (29.7) | 214 (24.6) | 0.115 | 456.4 (28.4) | 165.5 (29.0) | 0.013 | 460.1 (28.7) | 231.3 (26.3) | 0.053 |
| 65-74 years | 405 (25.1) | 168 (29.9) | 0.109 | 405 (25.1) | 238 (27.4) | 0.053 | 420.3 (26.2) | 150.9 (26.4) | 0.006 | 416.6 (26.0) | 228.3 (26.0) | <0.001 |
| 75-79 years | 238 (14.7) | 146 (26.0) | 0.283 | 238 (14.7) | 187 (21.5) | 0.177 | 279.0 (17.4) | 100.1 (17.5) | 0.004 | 273.4 (17.0) | 145.8 (16.6) | 0.012 |
| ≥80 years | 34 (2.1) | 33 (5.9) | 0.194 | 34 (2.1) | 56 (6.4) | 0.216 | 45.8 (2.9) | 18.2 (3.2) | 0.020 | 45.5 (2.8) | 37.1 (4.2) | 0.075 |
| **Gender, n (%)** |  |  |  |  |  |  |  |  |  |  |  |  |
| Male | 801 (49.6) | 304 (54.2) | 0.092 | 801 (49.6) | 479 (55.1) | 0.111 | 812.8 (50.6) | 282.6 (49.5) | 0.022 | 824.1 (51.3) | 456.2 (51.9) | 0.011 |
| Female | 814 (50.4) | 257 (45.8) | 0.092 | 814 (50.4) | 390 (44.9) | 0.111 | 792.4 (49.4) | 288.1 (50.5) | 0.022 | 781.0 (48.7) | 422.7 (48.1) | 0.011 |
| Missing/unknown | 0 (0.0) | 0 (0.0) |  | 0 (0.0) | 0 (0.0) |  | 0 (0.0) | 0 (0.0) |  | 0 (0.0) | 0 (0.0) |  |
| **Index VTE diagnosis, n (%)** |  |  | 0.304 |  |  | 0.261 |  |  | 0.079 |  |  | 0.013 |
| DVT only | 1013 (62.7) | 271 (48.3) |  | 1013 (62.7) | 434 (49.9) |  | 952.2 (59.3) | 346.5 (60.7) |  | 946.6 (59.0) | 523.7 (59.6) |  |
| PE only | 319 (19.8) | 171 (30.5) |  | 319 (19.8) | 221 (25.4) |  | 339.4 (21.1) | 129.5 (22.7) |  | 334.0 (20.8) | 181.6 (20.7) |  |
| Both DVT and PE | 283 (17.5) | 119 (21.2) |  | 283 (17.5) | 214 (24.6) |  | 313.6 (19.5) | 94.7 (16.6) |  | 324.4 (20.2) | 173.6 (19.8) |  |
| **Prior bleeding, n (%)** |  |  |  |  |  |  |  |  |  |  |  |  |
| Yes | 271 (16.8) | 87 (15.5) | 0.035 | 271 (16.8) | 107 (12.3) | 0.127 | 267.6 (16.7) | 94.1 (16.5) | 0.005 | 248.7 (15.5) | 143.9 (16.4) | 0.024 |
| No | 1344 (83.2) | 474 (84.5) | 0.035 | 1344 (83.2) | 762 (87.7) | 0.127 | 1337.6 (83.3) | 476.7 (83.5) | 0.005 | 1356.3 (84.5) | 735.1 (83.6) | 0.024 |
| Baseline CCI |  |  |  |  |  |  |  |  |  |  |  |  |
| Mean (SD) | 5.63 (2.58) | 5.30 (2.71) | 0.126 | 5.63 (2.58) | 5.08 (2.50) | 0.216 | 5.56 (2.62) | 5.59 (2.73) | 0.013 | 5.41 (2.62) | 5.41 (2.46) | 0.003 |
| Median (Range) | 6.0 (2.0 - 16.0) | 5.0 (2.0 - 16.0) |  | 6.0 (2.0 - 16.0) | 5.0 (2.0 - 15.0) |  | 6.0 (2.0 - 16.0) | 6.0 (2.0 - 15.8) |  | 6.0 (2.0 - 16.0) | 6.0 (2.0 - 15.0) |  |
| Interquartile range | 3.0 - 7.0 | 3.0 - 7.0 |  | 3.0 - 7.0 | 3.0 - 7.0 |  | 3.0 - 7.0 | 3.0 - 7.0 |  | 3.0 - 7.0 | 3.0 - 7.0 |  |
| **Selected CCI comorbidities during baseline** |  |  |  |  |  |  |  |  |  |  |  |  |
| Myocardial infarction | 32 (2.0) | 20 (3.6) | 0.097 | 32 (2.0) | 23 (2.6) | 0.044 | 35.5 (2.2) | 11.6 (2.0) | 0.013 | 33.5 (2.1) | 17.2 (2.0) | 0.010 |
| Congestive heart failure | 219 (13.6) | 109 (19.4) | 0.159 | 219 (13.6) | 174 (20.0) | 0.174 | 242.3 (15.1) | 87.3 (15.3) | 0.006 | 248.3 (15.5) | 135.8 (15.5) | 0.001 |
| Peripheral vascular disease | 224 (13.9) | 105 (18.7) | 0.132 | 224 (13.9) | 118 (13.6) | 0.008 | 240.0 (15.0) | 80.9 (14.2) | 0.022 | 217.2 (13.5) | 116.1 (13.2) | 0.009 |
| Cerebrovascular disease | 201 (12.4) | 93 (16.6) | 0.118 | 201 (12.4) | 140 (16.1) | 0.105 | 214.7 (13.4) | 71.3 (12.5) | 0.026 | 221.4 (13.8) | 122.2 (13.9) | 0.003 |
| Dementia | 45 (2.8) | 43 (7.7) | 0.221 | 45 (2.8) | 44 (5.1) | 0.117 | 68.8 (4.3) | 23.2 (4.1) | 0.011 | 58.0 (3.6) | 31.5 (3.6) | 0.002 |
| COPD and/or asthma | 425 (26.3) | 183 (32.6) | 0.139 | 425 (26.3) | 286 (32.9) | 0.145 | 453.8 (28.3) | 163.2 (28.6) | 0.007 | 450.6 (28.1) | 243.8 (27.7) | 0.007 |
| Peptic ulcer disease | 91 (5.6) | 19 (3.4) | 0.108 | 91 (5.6) | 29 (3.3) | 0.111 | 81.2 (5.1) | 24.7 (4.3) | 0.035 | 79.8 (5.0) | 46.7 (5.3) | 0.015 |
| Rheumatic disease | 117 (7.2) | 48 (8.6) | 0.049 | 117 (7.2) | 82 (9.4) | 0.079 | 120.3 (7.5) | 41.2 (7.2) | 0.011 | 125.0 (7.8) | 66.8 (7.6) | 0.007 |
| Diabetes without chronic complication | 176 (10.9) | 72 (12.8) | 0.060 | 176 (10.9) | 88 (10.1) | 0.025 | 184.1 (11.5) | 64.7 (11.3) | 0.004 | 167.0 (10.4) | 84.2 (9.6) | 0.027 |
| Diabetes with chronic complication | 150 (9.3) | 63 (11.2) | 0.064 | 150 (9.3) | 78 (9.0) | 0.011 | 158.5 (9.9) | 60.3 (10.6) | 0.023 | 146.9 (9.2) | 78.4 (8.9) | 0.008 |
| Mild liver disease | 219 (13.6) | 85 (15.2) | 0.045 | 219 (13.6) | 117 (13.5) | 0.003 | 221.8 (13.8) | 76.6 (13.4) | 0.012 | 213.5 (13.3) | 113.1 (12.9) | 0.013 |
| Moderate or severe liver disease | 16 (1.0) | 8 (1.4) | 0.040 | 16 (1.0) | 6 (0.7) | 0.033 | 17.2 (1.1) | 7.4 (1.3) | 0.021 | 13.7 (0.9) | 9.2 (1.0) | 0.019 |
| Renal disease | 357 (22.1) | 177 (31.6) | 0.214 | 357 (22.1) | 232 (26.7) | 0.107 | 391.0 (24.4) | 138.8 (24.3) | 0.001 | 371.7 (23.2) | 197.0 (22.4) | 0.018 |
| Hemiplegia or paraplegia | 61 (3.8) | 28 (5.0) | 0.059 | 61 (3.8) | 27 (3.1) | 0.037 | 63.8 (4.0) | 20.8 (3.7) | 0.017 | 55.2 (3.4) | 26.1 (3.0) | 0.027 |
| AIDS/HIV | 2 (0.1) | 1 (0.2) | 0.014 | 2 (0.1) | 5 (0.6) | 0.077 | 2.3 (0.1) | 0.5 (0.1) | 0.016 | 2.5 (0.2) | 5.8 (0.7) | 0.080 |
| **VTE related comorbidities during baseline, n (%)** |  |  |  |  |  |  |  |  |  |  |  |  |
| Hypertension | 944 (58.5) | 385 (68.6) | 0.213 | 944 (58.5) | 558 (64.2) | 0.118 | 981.6 (61.1) | 358.5 (62.8) | 0.034 | 963.4 (60.0) | 521.2 (59.3) | 0.015 |
| Sepsis (three months before index date) | 34 (2.1) | 13 (2.3) | 0.014 | 34 (2.1) | 11 (1.3) | 0.065 | 34.7 (2.2) | 11.3 (2.0) | 0.013 | 28.6 (1.8) | 19.5 (2.2) | 0.031 |
| Pneumonia (three months before index date) | 137 (8.5) | 86 (15.3) | 0.213 | 137 (8.5) | 128 (14.7) | 0.196 | 166.8 (10.4) | 56.5 (9.9) | 0.016 | 164.2 (10.2) | 87.6 (10.0) | 0.009 |
| Stroke (three months before index date) | 70 (4.3) | 32 (5.7) | 0.063 | 70 (4.3) | 42 (4.8) | 0.024 | 74.4 (4.6) | 23.8 (4.2) | 0.023 | 71.8 (4.5) | 38.6 (4.4) | 0.004 |
| Cardiac arrest (three months before index date) | 9 (0.6) | 0 (0.0) | 0.106 | 9 (0.6) | 2 (0.2) | 0.052 | 6.7 (0.4) | 0.0 (0.0) | 0.091 | 7.1 (0.4) | 2.8 (0.3) | 0.021 |
| Obesity | 373 (23.1) | 142 (25.3) | 0.052 | 373 (23.1) | 209 (24.1) | 0.022 | 383.2 (23.9) | 148.6 (26.0) | 0.050 | 377.4 (23.5) | 204.0 (23.2) | 0.007 |
| Inflammatory Bowel Disease | 24 (1.5) | 6 (1.1) | 0.037 | 24 (1.5) | 11 (1.3) | 0.019 | 21.9 (1.4) | 7.3 (1.3) | 0.008 | 23.1 (1.4) | 11.3 (1.3) | 0.014 |
| Varicose veins | 344 (21.3) | 121 (21.6) | 0.007 | 344 (21.3) | 208 (23.9) | 0.063 | 343.1 (21.4) | 126.4 (22.1) | 0.019 | 356.9 (22.2) | 203.4 (23.1) | 0.022 |
| Ischemic heart disease/coronary artery disease | 201 (12.4) | 98 (17.5) | 0.141 | 201 (12.4) | 146 (16.8) | 0.123 | 217.1 (13.5) | 74.8 (13.1) | 0.012 | 220.2 (13.7) | 120.0 (13.7) | 0.002 |
| Anemia | 347 (21.5) | 112 (20.0) | 0.038 | 347 (21.5) | 140 (16.1) | 0.138 | 341.1 (21.3) | 127.3 (22.3) | 0.026 | 318.2 (19.8) | 181.5 (20.7) | 0.021 |
| Coagulation defects | 215 (13.3) | 58 (10.3) | 0.092 | 215 (13.3) | 81 (9.3) | 0.126 | 199.4 (12.4) | 70.3 (12.3) | 0.003 | 194.1 (12.1) | 113.7 (12.9) | 0.026 |
| Dyspepsia | 324 (20.1) | 119 (21.2) | 0.028 | 324 (20.1) | 151 (17.4) | 0.069 | 327.2 (20.4) | 113.1 (19.8) | 0.014 | 307.2 (19.1) | 160.0 (18.2) | 0.024 |
| Hyperlipidemia | 365 (22.6) | 158 (28.2) | 0.128 | 365 (22.6) | 226 (26.0) | 0.079 | 385.5 (24.0) | 136.3 (23.9) | 0.003 | 374.7 (23.3) | 196.5 (22.4) | 0.024 |
| Sleep apnea | 87 (5.4) | 35 (6.2) | 0.036 | 87 (5.4) | 46 (5.3) | 0.004 | 87.1 (5.4) | 29.4 (5.2) | 0.012 | 84.0 (5.2) | 44.1 (5.0) | 0.010 |
| Spinal cord injury | 1 (0.1) | 0 (0.0) | 0.035 | 1 (0.1) | 0 (0.0) | 0.035 | 0.8 (0.1) | 0.0 (0.0) | 0.032 | 0.8 (0.0) | 0.0 (0.0) | 0.031 |
| Thrombophilia | 143 (8.9) | 38 (6.8) | 0.078 | 143 (8.9) | 63 (7.2) | 0.059 | 130.1 (8.1) | 42.3 (7.4) | 0.026 | 132.2 (8.2) | 81.9 (9.3) | 0.038 |
| Falls | N/A | N/A | N/A | N/A | N/A | N/A | N/A | N/A | N/A | N/A | N/A | N/A |
| **Medication within 90 days prior to index date, n (%)** |  |  |  |  |  |  |  |  |  |  |  |  |
| Platelet aggregation inhibitors | 69 (4.3) | 37 (6.6) | 0.103 | 69 (4.3) | 48 (5.5) | 0.058 | 75.4 (4.7) | 23.3 (4.1) | 0.030 | 77.4 (4.8) | 48.3 (5.5) | 0.030 |
| NSAIDs | 310 (19.2) | 100 (17.8) | 0.035 | 310 (19.2) | 165 (19.0) | 0.005 | 305.2 (19.0) | 109.0 (19.1) | 0.002 | 304.7 (19.0) | 165.0 (18.8) | 0.006 |
| Estrogen-based contraceptives and estrogen treatment for menopausal symptoms three months before index date | 15 (0.9) | 8 (1.4) | 0.046 | 15 (0.9) | 14 (1.6) | 0.061 | 17.3 (1.1) | 5.6 (1.0) | 0.009 | 18.4 (1.1) | 10.0 (1.1) | 0.001 |
| **Diagnostic setting, n (%)** |  |  |  |  |  |  |  |  |  |  |  |  |
| Inpatient | 667 (41.3) | 270 (48.1) | 0.138 | 667 (41.3) | 334 (38.4) | 0.059 | 692.1 (43.1) | 237.0 (41.5) | 0.032 | 643.1 (40.1) | 352.1 (40.1) | <0.001 |
| Outpatient | 948 (58.7) | 291 (51.9) | 0.138 | 948 (58.7) | 535 (61.6) | 0.059 | 913.1 (56.9) | 333.8 (58.5) | 0.032 | 961.9 (59.9) | 526.8 (59.9) | <0.001 |
| **Cancer site, n (%)** |  |  |  |  |  |  |  |  |  |  |  |  |
| Hematological malignancies | 149 (9.2) | 53 (9.4) | 0.008 | 149 (9.2) | 82 (9.4) | 0.007 | 148.7 (9.3) | 55.7 (9.8) | 0.017 | 149.7 (9.3) | 81.7 (9.3) | 0.001 |
| Non-GI solid tumors | 1000 (61.9) | 370 (66.0) | 0.084 | 1000 (61.9) | 597 (68.7) | 0.143 | 1003.7 (62.5) | 344.9 (60.4) | 0.043 | 1028.2 (64.1) | 571.5 (65.0) | 0.020 |
| **Cancer type, n (%)** |  |  |  |  |  |  |  |  |  |  |  |  |
| Metastatic solid tumor | 913 (56.5) | 203 (36.2) | 0.417 | 913 (56.5) | 308 (35.4) | 0.433 | 828.1 (51.6) | 299.4 (52.5) | 0.017 | 792.4 (49.4) | 433.9 (49.4) | <0.001 |
| GI cancer | 466 (28.9) | 138 (24.6) | 0.096 | 466 (28.9) | 190 (21.9) | 0.161 | 452.9 (28.2) | 170.2 (29.8) | 0.035 | 427.2 (26.6) | 225.7 (25.7) | 0.021 |
| Non-GI cancer | 1000 (61.9) | 370 (66.0) | 0.084 | 1000 (61.9) | 597 (68.7) | 0.143 | 1003.7 (62.5) | 344.9 (60.4) | 0.043 | 1028.2 (64.1) | 571.5 (65.0) | 0.020 |
| **Cancer risk type, n (%)** |  |  |  |  |  |  |  |  |  |  |  |  |
| Very high/high risk for VTE | 894 (55.4) | 237 (42.2) | 0.265 | 894 (55.4) | 372 (42.8) | 0.253 | 844.1 (52.6) | 318.5 (55.8) | 0.065 | 822.8 (51.3) | 459.9 (52.3) | 0.021 |
| Other cancers | 721 (44.6) | 324 (57.8) | 0.265 | 721 (44.6) | 497 (57.2) | 0.253 | 761.2 (47.4) | 252.3 (44.2) | 0.065 | 782.2 (48.7) | 419.1 (47.7) | 0.021 |
| **Cancer site prior to and on the index date, n (%)** |  |  |  |  |  |  |  |  |  |  |  |  |
| Leukemia | 50 (3.1) | 18 (3.2) | 0.006 | 50 (3.1) | 26 (3.0) | 0.006 | 54.7 (3.4) | 14.1 (2.5) | 0.055 | 54.4 (3.4) | 22.4 (2.5) | 0.049 |
| Multiple myeloma | 26 (1.6) | 13 (2.3) | 0.051 | 26 (1.6) | 15 (1.7) | 0.009 | 28.6 (1.8) | 12.1 (2.1) | 0.024 | 27.8 (1.7) | 15.5 (1.8) | 0.002 |
| Bladder cancer | 82 (5.1) | 27 (4.8) | 0.012 | 82 (5.1) | 63 (7.2) | 0.090 | 83.6 (5.2) | 20.7 (3.6) | 0.076 | 84.5 (5.3) | 63.6 (7.2) | 0.081 |
| Brain tumor | 56 (3.5) | 15 (2.7) | 0.046 | 56 (3.5) | 18 (2.1) | 0.085 | 55.8 (3.5) | 14.9 (2.6) | 0.051 | 57.9 (3.6) | 21.3 (2.4) | 0.069 |
| Gynecologic cancer | 168 (10.4) | 39 (7.0) | 0.123 | 168 (10.4) | 64 (7.4) | 0.107 | 152.4 (9.5) | 67.8 (11.9) | 0.077 | 147.3 (9.2) | 85.6 (9.7) | 0.019 |
| Lung cancer | 230 (14.2) | 58 (10.3) | 0.119 | 230 (14.2) | 93 (10.7) | 0.107 | 219.3 (13.7) | 78.1 (13.7) | <0.001 | 213.3 (13.3) | 111.7 (12.7) | 0.017 |
| Lymphoma | 115 (7.1) | 27 (4.8) | 0.098 | 115 (7.1) | 39 (4.5) | 0.113 | 108.5 (6.8) | 35.6 (6.2) | 0.021 | 105.8 (6.6) | 46.6 (5.3) | 0.055 |
| Urinary tract cancer | 100 (6.2) | 33 (5.9) | 0.013 | 100 (6.2) | 63 (7.2) | 0.042 | 98.9 (6.2) | 32.2 (5.6) | 0.022 | 98.5 (6.1) | 66.8 (7.6) | 0.058 |
| Testis cancer | 35 (2.2) | 10 (1.8) | 0.028 | 35 (2.2) | 22 (2.5) | 0.024 | 30.6 (1.9) | 20.8 (3.6) | 0.106 | 32.4 (2.0) | 33.9 (3.9) | 0.109 |
| Prostate cancer | 131 (8.1) | 101 (18.0) | 0.297 | 131 (8.1) | 133 (15.3) | 0.225 | 146.6 (9.1) | 63.1 (11.1) | 0.064 | 155.9 (9.7) | 98.2 (11.2) | 0.048 |
| Digestive organ cancer | 472 (29.2) | 140 (25.0) | 0.096 | 472 (29.2) | 195 (22.4) | 0.156 | 458.1 (28.5) | 175.2 (30.7) | 0.047 | 432.4 (26.9) | 233.0 (26.5) | 0.010 |
| Upper GI cancer | 85 (5.3) | 25 (4.5) | 0.038 | 85 (5.3) | 34 (3.9) | 0.065 | 81.6 (5.1) | 31.1 (5.5) | 0.017 | 76.1 (4.7) | 48.2 (5.5) | 0.034 |
| Lower GI cancer | 210 (13.0) | 69 (12.3) | 0.021 | 210 (13.0) | 127 (14.6) | 0.047 | 208.3 (13.0) | 76.4 (13.4) | 0.012 | 201.0 (12.5) | 135.5 (15.4) | 0.084 |
| Pancreatic cancer | 141 (8.7) | 36 (6.4) | 0.088 | 141 (8.7) | 28 (3.2) | 0.234 | 130.0 (8.1) | 62.7 (11.0) | 0.099 | 119.9 (7.5) | 47.1 (5.4) | 0.087 |
| Stomach cancer | 67 (4.1) | 16 (2.9) | 0.071 | 67 (4.1) | 22 (2.5) | 0.090 | 62.7 (3.9) | 23.0 (4.0) | 0.006 | 57.9 (3.6) | 36.7 (4.2) | 0.029 |
| Breast cancer | 258 (16.0) | 93 (16.6) | 0.016 | 258 (16.0) | 143 (16.5) | 0.013 | 261.8 (16.3) | 80.7 (14.1) | 0.060 | 269.6 (16.8) | 126.9 (14.4) | 0.065 |
| Lip, oral cavity and pharynx cancer | 26 (1.6) | 15 (2.7) | 0.074 | 26 (1.6) | 18 (2.1) | 0.034 | 27.1 (1.7) | 16.1 (2.8) | 0.077 | 27.0 (1.7) | 16.6 (1.9) | 0.015 |
| Bone cancer | 16 (1.0) | 3 (0.5) | 0.052 | 16 (1.0) | 12 (1.4) | 0.036 | 15.4 (1.0) | 5.7 (1.0) | 0.003 | 15.9 (1.0) | 11.9 (1.3) | 0.033 |
| Mesothelial cancer | 68 (4.2) | 13 (2.3) | 0.107 | 68 (4.2) | 20 (2.3) | 0.108 | 64.8 (4.0) | 13.5 (2.4) | 0.095 | 61.2 (3.8) | 21.5 (2.4) | 0.079 |
| Thyroid and endocrine cancer | 31 (1.9) | 10 (1.8) | 0.010 | 31 (1.9) | 15 (1.7) | 0.014 | 30.2 (1.9) | 9.3 (1.6) | 0.019 | 29.9 (1.9) | 14.4 (1.6) | 0.017 |
| Melanoma | 58 (3.6) | 20 (3.6) | 0.001 | 58 (3.6) | 42 (4.8) | 0.062 | 62.4 (3.9) | 18.1 (3.2) | 0.038 | 66.0 (4.1) | 38.3 (4.4) | 0.012 |
| Other cancer | 934 (57.8) | 211 (37.6) | 0.413 | 934 (57.8) | 328 (37.7) | 0.411 | 854.0 (53.2) | 306.6 (53.7) | 0.010 | 819.6 (51.1) | 450.8 (51.3) | 0.004 |

Abbreviations: CCI: Charlson Comorbidity Index; COPD: chronic obstructive pulmonary disease; GI: gastrointestinal; IPTW: inverse probability of treatment weighting; LMWH: low-molecular weight heparin; NSAID: non-steroidal inti-inflammatory drug; VTE: venous thromboembolism

**S4.5 Baseline characteristics before and after IPTW: DOAC vs. LMWH, patients with active cancer (Norway)**

|  | **Before IPTW** | | | | | | **After IPTW** | | | | | |
| --- | --- | --- | --- | --- | --- | --- | --- | --- | --- | --- | --- | --- |
| **LMWH + Apixaban** | | | **LMWH + Rivaroxaban** | | | **LMWH + Apixaban** | | | **LMWH + Rivaroxaban** | | |
| **Measure** | **LMWH N = 4,751** | **Apixaban N = 562** | **Standardized Difference for Unweighted Study Cohort** | **LMWH N = 4,751** | **Rivaroxaban N = 356** | **Standardized Difference for Unweighted Study Cohort** | **LMWH N = 4,751** | **Apixaban N = 562** | **Standardized Difference for Weighted Study Cohort** | **LMWH N = 4,751** | **Rivaroxaban N = 356** | **Standardized Difference for Weighted Study Cohort** |
| **Age at index (years)** |  |  | **0.098** |  |  | **0.185** |  |  | **0.041** |  |  | **0.117** |
| Mean (SD) | 67.4 (12.2) | 68.6 (11.8) |  | 67.4 (12.2) | 69.6 (11.3) |  | 67.5 (12.2) | 67.0 (12.6) |  | 67.6 (12.1) | 69.0 (11.7) |  |
| Median (Q1-Q3) | 69 (60 - 76) | 70 (61 - 76) |  | 69 (60 - 76) | 71 (63 - 77) |  | 69 (61 - 76) | 69 (60 - 75) |  | 69 (61 - 76) | 70 (63 - 77) |  |
| Range (min-max) | 20 - 100 | 20 - 95 |  | 20 - 100 | 26 - 99 |  | 20 - 100 | 20 - 95 |  | 20 - 100 | 26 - 99 |  |
| **Age groups, n (%)** |  |  |  |  |  |  |  |  |  |  |  |  |
| 18-54 years | 664 (14.0%) | 57 (10.1%) | 0.118 | 664 (14.0%) | 37 (10.4%) | 0.110 | 654 (13.8%) | 71 (12.6%) | 0.036 | 651 (13.7%) | 48 (13.5%) | 0.006 |
| 55-64 years | 1,007 (21.2%) | 131 (23.3%) | 0.051 | 1,007 (21.2%) | 60 (16.9%) | 0.111 | 997 (21.0%) | 151 (26.9%) | 0.138 | 998 (21.0%) | 56 (15.7%) | 0.136 |
| 65-74 years | 1,739 (36.6%) | 195 (34.7%) | 0.040 | 1,739 (36.6%) | 132 (37.1%) | 0.010 | 1,743 (36.7%) | 183 (32.6%) | 0.085 | 1,741 (36.6%) | 131 (36.7%) | 0.002 |
| 75-79 years | 620 (13.0%) | 86 (15.3%) | 0.065 | 620 (13.0%) | 64 (18.0%) | 0.136 | 622 (13.1%) | 75 (13.4%) | 0.010 | 622 (13.1%) | 63 (17.7%) | 0.128 |
| ≥80 years | 721 (15.2%) | 93 (16.5%) | 0.038 | 721 (15.2%) | 63 (17.7%) | 0.068 | 735 (15.5%) | 82 (14.5%) | 0.027 | 740 (15.6%) | 58 (16.3%) | 0.021 |
| **Gender, n (%)** |  |  | **0.195** |  |  | **0.164** |  |  | **0.019** |  |  | **0.095** |
| Male | 2,417 (50.9%) | 340 (60.5%) |  | 2,417 (50.9%) | 210 (59.0%) |  | 2,464 (51.9%) | 286 (50.9%) |  | 2,443 (51.4%) | 166 (46.7%) |  |
| Female | 2,334 (49.1%) | 222 (39.5%) |  | 2,334 (49.1%) | 146 (41.0%) |  | 2,287 (48.1%) | 276 (49.1%) |  | 2,308 (48.6%) | 190 (53.3%) |  |
| **Index VTE diagnosis, n (%)** |  |  | **0.115** |  |  | **0.240** |  |  | **0.072** |  |  | **0.126** |
| DVT | 1,346 (28.3%) | 189 (33.6%) |  | 1,346 (28.3%) | 141 (39.6%) |  | 1,369 (28.8%) | 144 (25.6%) |  | 1,386 (29.2%) | 125 (35.0%) |  |
| PE (with or without DVT) | 3,405 (71.7%) | 373 (66.4%) |  | 3,405 (71.7%) | 215 (60.4%) |  | 3,382 (71.2%) | 418 (74.4%) |  | 3,365 (70.8%) | 231 (65.0%) |  |
| **Baseline CCI** |  |  | **0.501** |  |  | **0.707** |  |  | **0.070** |  |  | **0.023** |
| Mean (SD) | 4.8 (2.1) | 3.8 (2.0) |  | 4.8 (2.1) | 3.4 (1.9) |  | 4.7 (2.1) | 4.9 (2.0) |  | 4.7 (2.1) | 4.7 (2.1) |  |
| Median (Q1-Q3) | 6 (2 - 6) | 3 (2 - 6) |  | 6 (2 - 6) | 2 (2 - 5) |  | 6 (2 - 6) | 6 (3 - 6) |  | 6 (2 - 6) | 6 (2 - 6) |  |
| Range (min-max) | 2 - 12 | 2 - 10 |  | 2 - 12 | 2 - 10 |  | 2 - 12 | 2 - 10 |  | 2 - 12 | 2 - 10 |  |
| **Selected CCI comorbidities during baseline** |  |  |  |  |  |  |  |  |  |  |  |  |
| Myocardial infarction any time before index date | 184 (3.9%) | 31 (5.5%) | 0.078 | 184 (3.9%) | 8 (2.2%) | 0.094 | 192 (4.0%) | 16 (2.9%) | 0.065 | 178 (3.8%) | 7 (1.9%) | 0.115 |
| Congestive heart failure any time before index date | 164 (3.5%) | 23 (4.1%) | 0.034 | 164 (3.5%) | 24 (6.7%) | 0.150 | 168 (3.5%) | 22 (3.9%) | 0.021 | 177 (3.7%) | 20 (5.5%) | 0.086 |
| Peripheral vascular disease any time before index date | 270 (5.7%) | 44 (7.8%) | 0.086 | 270 (5.7%) | 28 (7.9%) | 0.087 | 280 (5.9%) | 28 (4.9%) | 0.042 | 277 (5.8%) | 23 (6.3%) | 0.022 |
| Cerebrovascular disease any time before index date | 337 (7.1%) | 47 (8.4%) | 0.048 | 337 (7.1%) | 27 (7.6%) | 0.019 | 343 (7.2%) | 40 (7.1%) | 0.003 | 339 (7.1%) | 22 (6.0%) | 0.044 |
| Dementia any time before index date | 42 (0.9%) | <5 | 0.042 | 42 (0.9%) | <5 | 0.079 | 43 (0.9%) | <5 | 0.054 | 43 (0.9%) | 0 (0.08%) | 0.117 |
| COPD and/or asthma any time before index date | 571 (12.0%) | 83 (14.8%) | 0.081 | 571 (12.0%) | 52 (14.6%) | 0.076 | 584 (12.3%) | 69 (12.3%) | 0.000 | 580 (12.2%) | 41 (11.6%) | 0.019 |
| Peptic ulcer disease any time before index date | 181 (3.8%) | 26 (4.6%) | 0.041 | 181 (3.8%) | 10 (2.8%) | 0.056 | 185 (3.9%) | 20 (3.6%) | 0.017 | 178 (3.7%) | 14 (4.0%) | 0.012 |
| Rheumatic disease any time before index date | 217 (4.6%) | 33 (5.9%) | 0.059 | 217 (4.6%) | 26 (7.3%) | 0.116 | 224 (4.7%) | 31 (5.4%) | 0.033 | 226 (4.8%) | 16 (4.4%) | 0.015 |
| Diabetes without chronic complication any time before index date | 297 (6.3%) | 32 (5.7%) | 0.024 | 297 (6.3%) | 19 (5.3%) | 0.039 | 295 (6.2%) | 37 (6.7%) | 0.019 | 295 (6.2%) | 20 (5.5%) | 0.030 |
| Diabetes with chronic complication any time before index date | 154 (3.2%) | 20 (3.6%) | 0.018 | 154 (3.2%) | 10 (2.8%) | 0.025 | 156 (3.3%) | 16 (2.8%) | 0.029 | 153 (3.2%) | 8 (2.3%) | 0.057 |
| Mild liver disease any time before index date | 48 (1.0%) | 9 (1.6%) | 0.052 | 48 (1.0%) | <5 | 0.051 | 51 (1.1%) | 8 (1.4%) | 0.027 | 48 (1.0%) | <5 | 0.079 |
| Moderate or severe liver disease any time before index date | 26 (0.5%) | <5 | 0.002 | 26 (0.5%) | 0 (0%) | 0.105 | 27 (0.6%) | <5 | 0.023 | 26 (0.5%) | 0 (0%) | 0.104 |
| Renal disease any time before index date | 500 (10.5%) | 71 (12.6%) | 0.066 | 500 (10.5%) | 38 (10.7%) | 0.005 | 510 (10.7%) | 54 (9.6%) | 0.036 | 502 (10.6%) | 56 (15.7%) | 0.152 |
| Hemiplegia or paraplegia any time before index date | 20 (0.4%) | <5 | 0.039 | 20 (0.4%) | 0 (0%) | 0.092 | 20 (0.4%) | <5 | 0.011 | 20 (0.4%) | 0 (0%) | 0.092 |
| AIDS/HIV any time before index date | 8 (0.2%) | 0 (0%) | 0.058 | 8 (0.2%) | 0 (0%) | 0.058 | 8 (0.2%) | 0 (0%) | 0.060 | 8 (0.2%) | 0 (0%) | 0.058 |
| **VTE related comorbidities during baseline, n (%)** |  |  |  |  |  |  |  |  |  |  |  |  |
| Prior bleeding any time before index date | 594 (12.5%) | 77 (13.7%) | 0.036 | 594 (12.5%) | 44 (12.4%) | 0.004 | 601 (12.7%) | 75 (13.4%) | 0.023 | 594 (12.5%) | 37 (10.4%) | 0.066 |
| Hypertension any time before index date | 2,611 (55.0%) | 313 (55.7%) | 0.015 | 2,611 (55.0%) | 193 (54.2%) | 0.015 | 2,613 (55.0%) | 289 (51.5%) | 0.071 | 2,609 (54.9%) | 185 (52.0%) | 0.059 |
| Sepsis three months before index date | 142 (3.0%) | 12 (2.1%) | 0.054 | 142 (3.0%) | <5 | 0.132 | 138 (2.9%) | 12 (2.2%) | 0.044 | 136 (2.9%) | 11 (3.0%) | 0.009 |
| Pneumonia three months before index date | 623 (13.1%) | 62 (11.0%) | 0.064 | 623 (13.1%) | 31 (8.7%) | 0.142 | 613 (12.9%) | 76 (13.6%) | 0.020 | 609 (12.8%) | 56 (15.7%) | 0.083 |
| Stroke three months before index date | 82 (1.7%) | 9 (1.6%) | 0.010 | 82 (1.7%) | <5 | 0.051 | 81 (1.7%) | 7 (1.3%) | 0.035 | 80 (1.7%) | <5 | 0.039 |
| Cardiac arrest three months before index date | 15 (0.3%) | 5 (0.9%) | 0.074 | 15 (0.3%) | <5 | 0.069 | 15 (0.3%) | 5 (0.8%) | 0.070 | 15 (0.3%) | <5 | 0.036 |
| Obesity any time before index date | 118 (2.5%) | 12 (2.1%) | 0.023 | 118 (2.5%) | 9 (2.5%) | 0.003 | 116 (2.4%) | 15 (2.8%) | 0.020 | 118 (2.5%) | 7 (1.9%) | 0.042 |
| Inflammatory Bowel Disease any time before index date | 64 (1.3%) | 12 (2.1%) | 0.060 | 64 (1.3%) | 6 (1.7%) | 0.028 | 68 (1.4%) | 8 (1.4%) | 0.006 | 66 (1.4%) | <5 | 0.040 |
| Varicose veins any time before index date | 154 (3.2%) | 30 (5.3%) | 0.104 | 154 (3.2%) | 13 (3.7%) | 0.022 | 165 (3.5%) | 20 (3.5%) | 0.004 | 156 (3.3%) | 16 (4.4%) | 0.058 |
| Ischemic heart disease/coronary artery disease any time before index date | 468 (9.9%) | 74 (13.2%) | 0.104 | 468 (9.9%) | 33 (9.3%) | 0.020 | 484 (10.2%) | 54 (9.7%) | 0.018 | 466 (9.8%) | 28 (8.0%) | 0.065 |
| Anemia any time before index date | 784 (16.5%) | 92 (16.4%) | 0.004 | 784 (16.5%) | 43 (12.1%) | 0.127 | 785 (16.5%) | 101 (18.0%) | 0.040 | 770 (16.2%) | 58 (16.3%) | 0.002 |
| Coagulation defects any time before index date | 222 (4.7%) | 23 (4.1%) | 0.028 | 222 (4.7%) | 16 (4.5%) | 0.009 | 219 (4.6%) | 20 (3.6%) | 0.051 | 221 (4.7%) | 14 (4.0%) | 0.034 |
| Dyspepsia any time before index date | 279 (5.9%) | 31 (5.5%) | 0.015 | 279 (5.9%) | 23 (6.5%) | 0.024 | 278 (5.9%) | 44 (7.9%) | 0.080 | 281 (5.9%) | 18 (5.1%) | 0.035 |
| Hyperlipidemia any time before index date | 70 (1.5%) | 6 (1.1%) | 0.036 | 70 (1.5%) | <5 | 0.031 | 68 (1.4%) | 11 (1.9%) | 0.036 | 69 (1.5%) | <5 | 0.045 |
| Sleep apnea any time before index date | 177 (3.7%) | 37 (6.6%) | 0.130 | 177 (3.7%) | 16 (4.5%) | 0.039 | 191 (4.0%) | 21 (3.7%) | 0.018 | 179 (3.8%) | 7 (1.9%) | 0.112 |
| Spinal cord injury any time before index date | <5 | 0 (0%) | 0.029 | <5 | 0 (0%) | 0.029 | <5 | 0 (0%) | 0.030 | <5 | 0 (0%) | 0.028 |
| Thrombophilia any time before index date | 32 (0.7%) | 7 (1.2%) | 0.059 | 32 (0.7%) | 6 (1.7%) | 0.094 | 32 (0.7%) | 5 (0.9%) | 0.030 | 32 (0.7%) | <5 | 0.041 |
| Falls any time before index date | 205 (4.3%) | 25 (4.4%) | 0.007 | 205 (4.3%) | 10 (2.8%) | 0.081 | 207 (4.3%) | 28 (5.0%) | 0.032 | 200 (4.2%) | 13 (3.6%) | 0.033 |
| **Medication within 90 days prior to index date, n (%)** |  |  |  |  |  |  |  |  |  |  |  |  |
| Platelet aggregation inhibitors three months before index date | 681 (14.3%) | 87 (15.5%) | 0.032 | 681 (14.3%) | 66 (18.5%) | 0.114 | 686 (14.4%) | 73 (13.0%) | 0.043 | 695 (14.6%) | 36 (10.2%) | 0.135 |
| NSAIDs three months before index date | 517 (10.9%) | 59 (10.5%) | 0.012 | 517 (10.9%) | 40 (11.2%) | 0.011 | 514 (10.8%) | 52 (9.3%) | 0.051 | 517 (10.9%) | 37 (10.4%) | 0.016 |
| Estrogen-based contraceptives and estrogen treatment for menopausal symptoms three months before index date | 109 (2.3%) | 15 (2.7%) | 0.024 | 109 (2.3%) | 7 (2.0%) | 0.023 | 111 (2.3%) | 13 (2.3%) | 0.000 | 108 (2.3%) | 12 (3.3%) | 0.061 |
| **Diagnostic setting, n (%)** |  |  | **0.174** |  |  | **0.323** |  |  | **0.004** |  |  | **0.091** |
| Inpatient | 4,039 (85.0%) | 440 (78.3%) |  | 4,039 (85.0%) | 256 (71.9%) |  | 4,005 (84.3%) | 473 (84.2%) |  | 3,993 (84.0%) | 287 (80.6%) |  |
| Outpatient | 712 (15.0%) | 122 (21.7%) |  | 712 (15.0%) | 100 (28.1%) |  | 746 (15.7%) | 89 (15.8%) |  | 758 (16.0%) | 69 (19.4%) |  |
| **Cancer site, n (%)** |  |  |  |  |  |  |  |  |  |  |  |  |
| Hematological malignancies | 491 (10.3%) | 95 (16.9%) | 0.192 | 491 (10.3%) | 54 (15.2%) | 0.145 | 524 (11.0%) | 59 (10.5%) | 0.016 | 508 (10.7%) | 50 (14.1%) | 0.103 |
| **Cancer type, n (%)** |  |  |  |  |  |  |  |  |  |  |  |  |
| Metastatic Solid Tumor any time before index date | 2,830 (59.6%) | 180 (32.0%) | 0.575 | 2,830 (59.6%) | 82 (23.0%) | 0.799 | 2,695 (56.7%) | 342 (60.8%) | 0.083 | 2,708 (57.0%) | 198 (55.7%) | 0.026 |
| GI cancer | 1,606 (33.8%) | 137 (24.4%) | 0.209 | 1,606 (33.8%) | 68 (19.1%) | 0.338 | 1,562 (32.9%) | 223 (39.8%) | 0.143 | 1,556 (32.8%) | 107 (30.1%) | 0.058 |
| non-GI cancer | 2,654 (55.9%) | 330 (58.7%) | 0.058 | 2,654 (55.9%) | 234 (65.7%) | 0.203 | 2,665 (56.1%) | 279 (49.7%) | 0.128 | 2,687 (56.6%) | 199 (55.8%) | 0.014 |
| Cancer risk type, n (%) |  |  |  |  |  |  |  |  |  |  |  |  |
| High or very high risk for VTE | 2,338 (49.2%) | 189 (33.6%) | 0.320 | 2,338 (49.2%) | 112 (31.5%) | 0.368 | 2,260 (47.6%) | 261 (46.4%) | 0.024 | 2,278 (47.9%) | 160 (44.9%) | 0.061 |
| Other cancers | 2,413 (50.8%) | 373 (66.4%) | 0.320 | 2,413 (50.8%) | 244 (68.5%) | 0.368 | 2,491 (52.4%) | 301 (53.6%) | 0.024 | 2,473 (52.1%) | 196 (55.1%) | 0.061 |
| **Cancer site prior to and on the index date, n (%)** |  |  |  |  |  |  |  |  |  |  |  |  |
| Leukemia | 88 (1.9%) | 30 (5.3%) | 0.188 | 88 (1.9%) | 8 (2.2%) | 0.028 | 98 (2.1%) | 13 (2.3%) | 0.017 | 94 (2.0%) | <5 | 0.059 |
| Multiple myeloma | 151 (3.2%) | 32 (5.7%) | 0.122 | 151 (3.2%) | 19 (5.3%) | 0.107 | 171 (3.6%) | 14 (2.5%) | 0.066 | 165 (3.5%) | 9 (2.6%) | 0.048 |
| Bladder cancer | 163 (3.4%) | 45 (8.0%) | 0.198 | 163 (3.4%) | 24 (6.7%) | 0.151 | 163 (3.4%) | 44 (7.8%) | 0.192 | 163 (3.4%) | 22 (6.1%) | 0.124 |
| Brain tumor | 179 (3.8%) | 7 (1.2%) | 0.162 | 179 (3.8%) | 8 (2.2%) | 0.089 | 180 (3.8%) | 14 (2.5%) | 0.075 | 180 (3.8%) | 5 (1.5%) | 0.143 |
| Gynecologic cancer | 337 (7.1%) | 11 (2.0%) | 0.249 | 337 (7.1%) | 10 (2.8%) | 0.198 | 319 (6.7%) | 15 (2.7%) | 0.189 | 325 (6.8%) | 18 (5.2%) | 0.070 |
| Lung cancer | 778 (16.4%) | 51 (9.1%) | 0.220 | 778 (16.4%) | 29 (8.1%) | 0.253 | 754 (15.9%) | 73 (12.9%) | 0.084 | 761 (16.0%) | 45 (12.5%) | 0.099 |
| Lymphoma | 291 (6.1%) | 32 (5.7%) | 0.018 | 291 (6.1%) | 24 (6.7%) | 0.025 | 291 (6.1%) | 32 (5.8%) | 0.015 | 287 (6.0%) | 36 (10.2%) | 0.154 |
| Urinary tract cancer | 139 (2.9%) | 22 (3.9%) | 0.054 | 139 (2.9%) | 8 (2.2%) | 0.043 | 135 (2.8%) | 24 (4.2%) | 0.077 | 136 (2.9%) | 13 (3.7%) | 0.046 |
| Testis cancer | 36 (0.8%) | 6 (1.1%) | 0.033 | 36 (0.8%) | 5 (1.4%) | 0.063 | 34 (0.7%) | 7 (1.2%) | 0.052 | 34 (0.7%) | <5 | 0.029 |
| Prostate cancer | 372 (7.8%) | 86 (15.3%) | 0.235 | 372 (7.8%) | 70 (19.7%) | 0.349 | 402 (8.5%) | 43 (7.7%) | 0.026 | 403 (8.5%) | 36 (10.0%) | 0.054 |
| Digestive organ cancer | 1,605 (33.8%) | 137 (24.4%) | 0.208 | 1,605 (33.8%) | 68 (19.1%) | 0.338 | 1,563 (32.9%) | 222 (39.6%) | 0.139 | 1,556 (32.8%) | 107 (30.1%) | 0.058 |
| Upper GI cancer | 197 (4.1%) | 7 (1.2%) | 0.180 | 197 (4.1%) | <5 | 0.238 | 190 (4.0%) | 22 (3.9%) | 0.007 | 190 (4.0%) | 9 (2.5%) | 0.088 |
| Lower GI cancer | 1,037 (21.8%) | 109 (19.4%) | 0.060 | 1,037 (21.8%) | 64 (18.0%) | 0.097 | 1,021 (21.5%) | 157 (27.9%) | 0.148 | 1,012 (21.3%) | 90 (25.4%) | 0.096 |
| Pancreatic cancer | 311 (6.5%) | 13 (2.3%) | 0.207 | 311 (6.5%) | <5 | 0.328 | 289 (6.1%) | 36 (6.5%) | 0.017 | 294 (6.2%) | 10 (2.9%) | 0.157 |
| Stomach cancer | 132 (2.8%) | 6 (1.1%) | 0.125 | 132 (2.8%) | <5 | 0.174 | 124 (2.6%) | 21 (3.8%) | 0.065 | 125 (2.6%) | 9 (2.5%) | 0.012 |
| Breast cancer | 457 (9.6%) | 71 (12.6%) | 0.096 | 457 (9.6%) | 42 (11.8%) | 0.071 | 469 (9.9%) | 55 (9.7%) | 0.005 | 477 (10.0%) | 37 (10.4%) | 0.012 |
| Lip, oral cavity and pharynx cancer | 61 (1.3%) | 6 (1.1%) | 0.020 | 61 (1.3%) | 9 (2.5%) | 0.091 | 64 (1.3%) | <5 | 0.053 | 63 (1.3%) | 5 (1.4%) | 0.010 |
| Bone cancer | 20 (0.4%) | 0 (0%) | 0.092 | 20 (0.4%) | 0 (0%) | 0.092 | 21 (0.4%) | 0 (0%) | 0.094 | 21 (0.4%) | 0 (0%) | 0.095 |
| Mesothelial cancer | 82 (1.7%) | <5 | 0.093 | 82 (1.7%) | <5 | 0.079 | 85 (1.8%) | 6 (1.0%) | 0.068 | 86 (1.8%) | <5 | 0.077 |
| Thyroid and endocrine cancer | 30 (0.6%) | <5 | 0.071 | 30 (0.6%) | 6 (1.7%) | 0.099 | 31 (0.6%) | <5 | 0.089 | 30 (0.6%) | 7 (2.1%) | 0.125 |
| Melanoma | 124 (2.6%) | 30 (5.3%) | 0.140 | 124 (2.6%) | 15 (4.2%) | 0.088 | 126 (2.6%) | 24 (4.3%) | 0.090 | 126 (2.7%) | 9 (2.5%) | 0.008 |
| Other cancer | 2,109 (44.4%) | 125 (22.2%) | 0.483 | 2,109 (44.4%) | 42 (11.8%) | 0.778 | 2,012 (42.4%) | 246 (43.8%) | 0.030 | 2,021 (42.5%) | 85 (23.7%) | 0.408 |

Abbreviations: CCI: Charlson Comorbidity Index; COPD: chronic obstructive pulmonary disease; GI: gastrointestinal; IPTW: inverse probability of treatment weighting; LMWH: low-molecular weight heparin; NSAID: non-steroidal inti-inflammatory drug; VTE: venous thromboembolism

**S5. Bleeding Outcome and rVTE Rates by Country and Index Treatment, Pre-IPTW**

|  | | **LMWH** | | | **Apixaban** | | | **Rivaroxaban** | | |
| --- | --- | --- | --- | --- | --- | --- | --- | --- | --- | --- |
| **Events** | **Person Years** | **Rate per 100 person** | **Events** | **Person Years** | **Rate per 100 person** | **Events** | **Person Years** | **Rate per 100 person years (95%CI)** |
| **years (95%CI)** | **years (95%CI)** |
| **Overall bleeding** | Sweden | 535 (4.4%) | 3675 | 14.6 (13.3 - 15.8) | 24 (3.6%) | 249 | 9.6 (6.2 - 14.4) | 23 (3.0%) | 294 | 7.8 (5.0 - 11.7) |
| Norway | 311 (6.5%) | 1410 | 22.0 (19.7 - 24.6) | 20 (3.6%) | 201 | 9.9 (6.1 - 15.4) | 16 (4.5%) | 124 | 13.0 (7.4 - 21.0) |
| UK | 361 (4.3%) | 2297 | 15.7 (14.1 - 17.4) | 15 (2.4%) | 213 | 7.1 (3.9 - 11.6) | 38 (3.6%) | 334 | 11.4 (8.1 - 15.6) |
| Germany - AOK | 301 (9.4%) | 668 | 45.1 (40.2, 50.4) | 41 (8.9%) | 159 | 25.9 (19.0, 35.1) | 114 (9.3%) | 390 | 29.2 (24.3, 35.1) |
| Germany - GWQ | 135 (8.4%) | 332 | 40.7 (33.8, 47.5) | 84 (9.7%) | 264 | 31.9 (25.7, 39.5) | <5 | -- | -- |
| Finland | 182 (3.9%) | 1566 | 11.6 (10.0 - 13.4) | 6 (3.7%) | 62 | 9.7 (3.6 - 21.2) | <5 | -- | -- |
| **GI bleeding** | Sweden | 190 (1.6%) | 3737 | 5.1 (4.4 - 5.9) | 8 (1.2%) | 251 | 3.2 (1.4 - 6.3) | 7 (0.9%) | 295 | 2.4 (1.0 - 4.9) |
| Norway | 112 (2.4%) | 1446 | 7.7 (6.4 - 9.3) | 11 (2.0%) | 202 | 5.4 (2.7 - 9.7) | 6 (1.7%) | 125 | 4.8 (1.8 - 10.4) |
| UK | 149 (1.8%) | 2322 | 6.4 (5.4 - 7.5) | 8 (1.3%) | 213 | 3.8 (1.6 - 7.4) | 16 (1.5%) | 337 | 4.8 (2.7 - 7.7) |
| Germany - AOK | 86 (2.7%) | 701 | 12.3 (9.9, 15.2) | 15 (3.3%) | 163 | 9.2 (5.6, 15.3) | 42 (3.4%) | 402 | 10.5 (7.7, 14.1) |
| Germany - GWQ | 37 (2.3%) | 346 | 10.7 (7.3, 14.1) | 8 (1.4%) | 199 | 4.0 (2.0, 8.0) | 18 (2.1%) | 274 | 6.6 (4.1, 10.4) |
| Finland | 49 (1.0%) | 1593 | 3.1 (2.3 - 4.1) | <5 |  | 1.6 | <5 |  | 1.1 |
| **ICH** | Sweden | 87 (0.7%) | 3759 | 2.3 (1.9 - 2.9) | <5 | -- | -- | <5 | -- | -- |
| Norway | 34 (0.7%) | 1463 | 2.3 (1.6 - 3.2) | <5 | -- | -- | <5 | -- | -- |
| UK | 47 (0.6%) | 2336 | 2.0 (1.5 - 2.7) | <5 | -- | -- | <5 | -- | -- |
| Germany - AOK | 15 (0.5%) | 710 | 2.11 (1.3, 3.5) | <5 | -- | -- | <5 | -- | -- |
| Germany - GWQ | 6 (0.4%) | 350 | 1.71 (0.8, 3.8) | <5 | -- | -- | <5 | -- | -- |
| Finland | 33 (0.7%) | 1597 | 2.1 (1.4 - 2.9) | 0 | 0 | 0 | <5 | -- | -- |
| **Other bleeding** | Sweden | 302 (2.5%) | 3710 | 8.1 (7.2 - 9.1) | 18 (2.7%) | 249 | 7.2 (4.3 - 11.4) | 14 (1.8%) | 295 | 4.7 (2.6 - 8.0) |
| Norway | 203 (4.3%) | 1428 | 14.2 (12.3 - 16.3) | 9 (1.6%) | 203 | 4.4 (2.0 - 8.4) | 9 (2.5%) | 124 | 7.3 (3.3 - 13.8) |
| UK | 182 (2.2%) | 2317 | 7.9 (6.8 - 9.1) | 7 (1.1%) | 214 | 3.3 (1.3 - 6.7) | 21 (2.0%) | 335 | 6.3 (3.9 - 9.6) |
| Germany - AOK | 228 (7.1%) | 676 | 33.72 (29.6, 38.4) | 28 (6.1%) | 162 | 17.3 (12.0, 25.1) | 79 (6.4%) | 395 | 20.0 (16.0, 24.9) |
| Germany - GWQ | 116 (7.2%) | 335 | 34.60 (28.8, 41.5) | 20 (3.6%) | 197 | 10.1 (6.5, 15.7) | 72 (8.3%) | 265 | 27.1 (21.5, 34.2) |
| Finland | 105 (2.2%) | 1578 | 6.7 (5.4 - 8.1) | 5 (3.1%) | 62 | 8.1 (2.6 - 18.8) | <5 |  | 2.2 |
| **rVTE** | Sweden | 233 (1.9%) | 3533 | 6.6 (5.8 - 7.5) | <5 | -- | -- | 10 (1.3%) | 283 | 3.5 (1.7 - 6.5) |
| Norway | 86 (1.8%) | 1449 | 5.9 (4.7 - 7.3) | 5 (0.9%) | 204 | 2.5 (0.8 - 5.7) | <5 | -- | -- |
| UK | 94 (1.1%) | 2282 | 4.1 (3.3 - 5.0) | 8 (1.3%) | 211 | 3.8 (1.6 - 7.5) | <5 | -- | -- |
| Germany - AOK | 60 (1.9%) | 703 | 8.5 (6.6, 11.0) | 7 (1.5%) | 165 | 4.3 (2.0, 8.9) | 16 (1.3%) | 403 | 4.0 (2.4, 6.5) |
| Germany - GWQ | 45 (2.8%) | 344 | 13.1 (9.8, 17.5) | 5 (0.9%) | 200 | 2.5 (1.0, 6.0) | 11 (1.3%) | 275 | 4.0 (2.2, 7.2) |
| Finland | 97 (2.1%) | 1514 | 6.4 (5.2 - 7.8) | <5 | -- | -- | <5 | -- | -- |

Abbreviations: AOK: Allgemeine Ortskrankenkasse; GI: gastrointestinal; GWQ: Gesellschaft für Wirtschaftlichkeit und Qualität bei Krankenkassen; ICH: intracranial hemorrhage; LMWH: low-molecular weight heparin; rVTE: recurrent; venous thromboembolism
